# Supplementary material
Source: publisher figshare collection journal article supplement (https://acs.figshare.com/ndownloader/files/5194375)

# Supporting Information

## Investigation of Lewis Acid Catalyzed Asymmetric Aza-Diels-Alder Reactions of *2H*-Azirines

Åsa Sjöholm Timén, and Peter Somfai\*

KTH Chemistry, Organic Chemistry, SE-100 44 Stockholm, Sweden

somfai@kth.se

Phone (+46)-8-790 6960. Fax: (+46)-8-791 2333

### Content:

- S2-S6: Experimental data for compounds **25a,b**, **26a,b**, **1a,b**  
S7-S28: <sup>1</sup>H and <sup>13</sup>C NMR spectra for compounds **3b**, **4b**, **3a**, **4a**, **6**, **7**, **9a**, **10a**, **9b**,  
**10b**, **12**, **13**, **14b**, **14a**, **14c**, **25a**, **25b**, **26a**, **26b**, **1a**, **1b**

## General Methods.

$^1\text{H}$  and  $^{13}\text{C}$  NMR spectra were recorded in  $\text{CDCl}_3$  with the residual peak of  $\text{CHCl}_3$  ( $^1\text{H}$  NMR  $\delta$  7.26 and  $^{13}\text{C}$  NMR  $\delta$  77.0) as internal standard. The chemical shifts are reported in the  $\delta$ -scale with multiplicity (br=broad, s=singlet, d=doublet, t=triplet, q=quartet, m=multiplet), coupling constant (Hz), and integration. Optical rotations,  $[\alpha]_D$ , were measured at the sodium D-line. Analytical TLC plates were visualized with UV light, iodine in methanol or phosphomolybdic acid (5% in ethanol). Air- and moisture sensitive reactions were performed with oven- or flame-dried equipment under an atmospheric pressure of nitrogen or argon. All liquid reagents were transferred using oven-dried cannulas. The solvents were dried by distillation immediately before use,  $\text{CH}_2\text{Cl}_2$  from  $\text{CaH}_2$  and toluene from sodium/benzophenone. The DMF was dried over 4 Å molecular sieves.

**(1*R*,2*S*,4*S*)-*N*-(2,3-dibromopropionyl)-bornane-2,10-sultam 25a:** Following a literature procedure<sup>1</sup> compound **25a** was obtained in 81% yield as colorless crystals. Analytical data for the diastereomeric mixture: mp: decomposition before melting;  $^1\text{H}$  NMR (400 MHz,  $\text{CDCl}_3$ )  $\delta$  5.13(m, 1H), 4.06(dd,  $J$  = 11.1, 9.8 Hz, 1H), 4.01(dd,  $J$  = 7.6, 5.0 Hz, 1H, major isomer), 3.94(dd,  $J$  = 8.1, 5.0 Hz, 1H, minor isomer), 3.72(dd,  $J$  = 9.6, 4.3 Hz, 1H, minor isomer), 3.67(dd,  $J$  = 9.6, 4.0 Hz, 1H, major isomer), 3.52(m, 2H), 2.05-2.17(m, 2H), 1.86-1.98(m, 3H), 1.34-1.48(m, 2H), 1.18(s, 3H, minor isomer), 1.17(s, 3H, major isomer), 0.98(s, 3H);  $^{13}\text{C}$  NMR (100 MHz,  $\text{CDCl}_3$ )  $\delta$  165.5, 65.6, 64.9, 52.9, 48.9, 47.9, 44.4, 40.0, 39.5, 37.8, 37.3, 32.8, 32.6, 30.5, 28.2, 26.41, 26.36, 20.7, 20.5, 19.91, 19.86 HRMS (FAB+) calculated for  $\text{C}_{13}\text{H}_{20}\text{Br}_2\text{NO}_3\text{S}$  (M+H): 427.9531, found: 427.9534.

**(1*R*,2*S*,5*R*)-2-(1-methyl-1-phenylethyl)-5-methylcyclohexyl-(2,3-dibromo)-**

**propionate 25b:** To a solution of **24a** (0.46 g, 1.6 mmol) in CH<sub>2</sub>Cl<sub>2</sub> (7 mL) was added Br<sub>2</sub> (90  $\mu$ L, 1.8 mmol). The reaction mixture was heated to 50 °C in a sealed tube for 30 min and then allowed to reach room temperature before addition of Na<sub>2</sub>S<sub>2</sub>O<sub>3</sub> (aq) until no color remained. The resulting bi-phase mixture was filtered through an Extrelute<sup>®</sup> tube, which was rinsed with CH<sub>2</sub>Cl<sub>2</sub> (15 mL). The resulting organic phase was concentrated before purification by filtration through a plug of SiO<sub>2</sub> (pentane–Et<sub>2</sub>O). Dibromide **25b** was obtained as a mixture of diastereomers in 95% yield (0.68 g) as a colorless oil. <sup>1</sup>H NMR (400 MHz, CDCl<sub>3</sub>)  $\delta$  7.31(br d,  $J$  = 4.3 Hz, 4H), 7.18(m, 1H), 4.83(td,  $J$  = 10.6, 4.3 Hz, 1H, major isomer), 3.97(dd,  $J$  = 9.8, 4.8 Hz, 1H, minor isomer), 3.61-3.73(m, 2H), 3.47-3.53(m, 1H), 2.0-2.11(m, 1H), 1.94-2.0(m, 1H), 1.58-1.73(m, 2H), 1.43-1.53(m, 1H), 1.36(s, 3H, minor isomer), 1.34(s, 3H, major isomer), 1.25(s, 3H, minor isomer), 1.24(s, 3H, major isomer), 0.97-1.15(m, 2H), 0.89(d,  $J$  = 6.3 Hz, 3H, major isomer), 0.88(d,  $J$  = 6.5 Hz, 3H, minor isomer), 0.84-0.93(m, 1H); <sup>13</sup>C NMR (100 MHz, CDCl<sub>3</sub>)  $\delta$  166.73, 166.68, 151.3, 151.1, 128.0, 125.6, 125.5, 125.2, 125.1, 78.1, 77.05, 50.4, 50.2, 43.3, 41.3, 41.1, 40.2, 39.9, 39.6, 34.4, 31.3, 31.2, 30.9, 29.7, 27.6, 26.8, 26.53, 26.49, 25.2, 21.7 HRMS (FAB+) calculated for C<sub>19</sub>H<sub>27</sub>Br<sub>2</sub>O<sub>2</sub> (M+H): 445.0378, found: 445.0363.

**(1*R*,2*S*,4*S*)-*N*-(2-azidopropenoyl)-bornane-2,10-sultam 26a:** A solution of dibromide **25a** (190 mg, 0.44 mmol) in DMF (2.5 mL) was added to a pre-heated (60 °C) suspension of NaN<sub>3</sub> (58 mg, 0.89 mmol) in dry DMF (2.5 mL). The reaction mixture was heated at 60 °C for 8 min before addition of an ice and water mixture (20 mL). The

resulting mixture was extracted with Et<sub>2</sub>O and the organic phase then washed with H<sub>2</sub>O and brine and then dried over MgSO<sub>4</sub>, filtered and evaporated. Purification by chromatography (SiO<sub>2</sub>, pentane–Et<sub>2</sub>O–CH<sub>2</sub>Cl<sub>2</sub>) gave **26a** as a white semi-solid in 56% yield (76 mg).  $[\alpha]_D^{25} = +185$  (c = 0.1, CH<sub>2</sub>Cl<sub>2</sub>); IR (neat):  $\nu_{\max} = 2111, 1679, 1616, 1340, 1171, 1134$ ; <sup>1</sup>H NMR (400 MHz, CDCl<sub>3</sub>)  $\delta$  5.55(d, *J* = 2.5 Hz, 1H), 5.45(d, *J* = 2.5 Hz, 1H), 4.11(dd, *J* = 7.8, 4.7 Hz, 1H), 3.55(A-part of ABq, *J* = 13.6 Hz, 1H), 3.44(B-part of ABq, *J* = 13.6 Hz, 1H), 1.91-2.11(m, 5H), 1.34-1.47(m, 2H), 4.22(s, 3H), 1.01(s, 3H); <sup>13</sup>C NMR (125 MHz, CDCl<sub>3</sub>)  $\delta$  163.9, 138.2, 111.3, 65.7, 53.7, 48.1, 47.8, 45.3, 38.1, 33.3, 26.4, 21.3, 19.8; HRMS (FAB+) calculated for C<sub>13</sub>H<sub>19</sub>N<sub>4</sub>O<sub>3</sub>S (M+H): 311.1178, found: 311.1179.

**(1*R*,2*S*,5*R*)-2-(1-methyl-1-phenylethyl)-5-methylcyclohexyl-(2-azido)-acrylate 26b:**

A solution of dibromide **25b** (640 mg, 1.43 mmol) in DMF (6 mL) was added to a pre-heated (85 °C) suspension of NaN<sub>3</sub> (196 mg, 3.0 mmol) in dry DMF (10 mL). The reaction mixture was heated at 85 °C for exactly 20 min before addition of an ice and water mixture (50 mL). The resulting mixture was extracted with Et<sub>2</sub>O and the resulting organic phase was then washed with H<sub>2</sub>O and brine and dried over MgSO<sub>4</sub> before filtration and concentration. Purification by chromatography (SiO<sub>2</sub>, pentane–Et<sub>2</sub>O) gave **26b** as a colorless oil in 65% yield (305 mg).  $[\alpha]_D^{25} = -63$  (c = 0.42, CH<sub>2</sub>Cl<sub>2</sub>); IR (film):  $\nu_{\max} = 2955, 2923, 2125, 1716, 1615, 1254$ ; <sup>1</sup>H NMR (400 MHz, CDCl<sub>3</sub>)  $\delta$  7.24-7.29(m, 4H), 7.08-7.13(m, 1H), 5.10(d, *J* = 1.3 Hz, 1H), 4.99(d, *J* = 1.5 Hz, 1H), 4.95(td, *J* = 10.8, 4.5 Hz, 1H), 2.12(ddd, *J* = 12.3, 10.8, 3.8 Hz, 1H), 1.88-1.93(m, 1H), 1.77(dq, *J* = 13.3, 3.5 Hz, 1H), 1.65-1.71(m, 1H), 1.44-1.56(m, 1H), 1.32(s, 3H), 1.22(s, 3H), 1.15(app qd, *J* = 13.1, 3.3 Hz, 1H), 1.04(app q, *J* = 11.1 Hz, 1H), 0.85-0.86(m, 1H),

0.89(d,  $J = 6.5$  Hz, 3H);  $^{13}\text{C}$  NMR (100 MHz,  $\text{CDCl}_3$ )  $\delta$  161.1, 151.3, 135.6, 128.1, 125.3, 125.1, 110.8, 76.3, 50.3, 41.4, 39.6, 34.4, 31.3, 28.4, 26.5, 24.6, 21.7; HRMS (FAB+) calculated for  $\text{C}_{19}\text{H}_{26}\text{N}_3\text{O}_2$  (M+H): 328.2025, found: 328.2024.

**General Procedure for the Synthesis of 3-Substituted-2H-azirines **1a** and **1b** from Vinyl Azides **26a** and **26b**.<sup>2</sup>**

**(1*R*,2*S*,5*R*)-2-(1-methyl-1-phenylethyl)-5-methylcyclohexyl-2*H*-azirine-3-carboxylate **1b****: Vinyl azide **26b** (70 mg, 0.21 mmol) was dissolved in dry  $\text{CH}_2\text{Cl}_2$  (3.0 mL) and heated in a sealed tube at 150 °C for 20 min and then cooled to 0 °C. CAUTION! Heating azides may cause explosion. Evaporation gave **1b** in quantitative yield and in high purity (no purification necessary).  $[\alpha]_{\text{D}}^{25} = +7$  ( $c = 0.27$ ,  $\text{CH}_2\text{Cl}_2$ ); IR (neat):  $\nu_{\text{max}} = 2923, 2955, 1746, 1716, 1210$ ;  $^1\text{H}$  NMR (400 MHz,  $\text{CDCl}_3$ )  $\delta$  7.24-7.27 (m, 2 H), 7.19(m, 2 H), 7.05(tt,  $J = 7.2, 1.3$  Hz, 1 H), 5.11(td,  $J = 10.8, 4.9$  Hz, 1 H), 2.17(ddd,  $J = 12.3, 10.8, 3.7$  Hz, 1 H), 1.91-1.97(m, 1 H), 1.87(app dq,  $J = 13.6, 3.6$  Hz, 1 H), 1.68-1.74(m, 1 H), 1.65(A-part of ABq,  $J = 8.3$  Hz, 1 H), 1.60(B-part of ABq,  $J = 8.3$  Hz, 1 H), 1.47-1.56(m, 1 H), 1.35(s, 3 H), 1.25(s, 3 H), 1.18-1.26(m, 1H), 1.15( app q,  $J = 12.1$  Hz, 1H), 0.88-0.99(m, 1 H), 0.91(d,  $J = 6.5$  Hz, 3 H);  $^{13}\text{C}$  NMR (100 MHz,  $\text{CDCl}_3$ )  $\delta$  164.7, 157.5, 150.8, 127.9, 125.3, 125.2, 77.2, 50.3, 41.4, 39.5, 34.2, 31.4, 29.0, 26.3, 24.2, 23.7, 21.7.

**(1*R*,2*S*,4*S*)-*N*-(2*H*-azirine-3-carbonyl)-bornane-2,10-sultam **1a****: Prepared from **26a** as described for **1b** and obtained in quantitative yield and in high purity (no purification necessary).  $[\alpha]_{\text{D}}^{25} = +93$  ( $c = 0.55$ ,  $\text{CH}_2\text{Cl}_2$ ); IR (neat):  $\nu_{\text{max}} = 1723, 1678, 1341, 1169, 1142$ ;  $^1\text{H}$  NMR (400 MHz,  $\text{CDCl}_3$ )  $\delta$  4.08(dd,  $J = 7.8, 5.0$  Hz, 1H), 3.58(A-part of ABq,  $J$

= 13.6 Hz, 1H), 3.49(B-part of ABq,  $J$  = 13.8 Hz, 1H), 2.14-2.30(m, 4H), 1.9-2.03(m, 3H), 1.37-1.50(m, 2H), 1.20(s, 3H), 1.01(s, 3H);  $^{13}\text{C}$  NMR (100 MHz,  $\text{CDCl}_3$ )  $\delta$  165.9, 155.9, 65.0, 53.2, 49.5, 47.9, 44.9, 38.0, 33.1, 27.7, 26.3, 21.0, 19.8.

(1) Garner, P.; Dogan, O.; Pillai, S. *Tetrahedron Lett.* **1994**, 35, 1653-1656.

(2) Sjöholm Timén, Å.; Risberg, E.; Somfai, P. *Tetrahedron Lett.* **2003**, 44, 5339-5341.



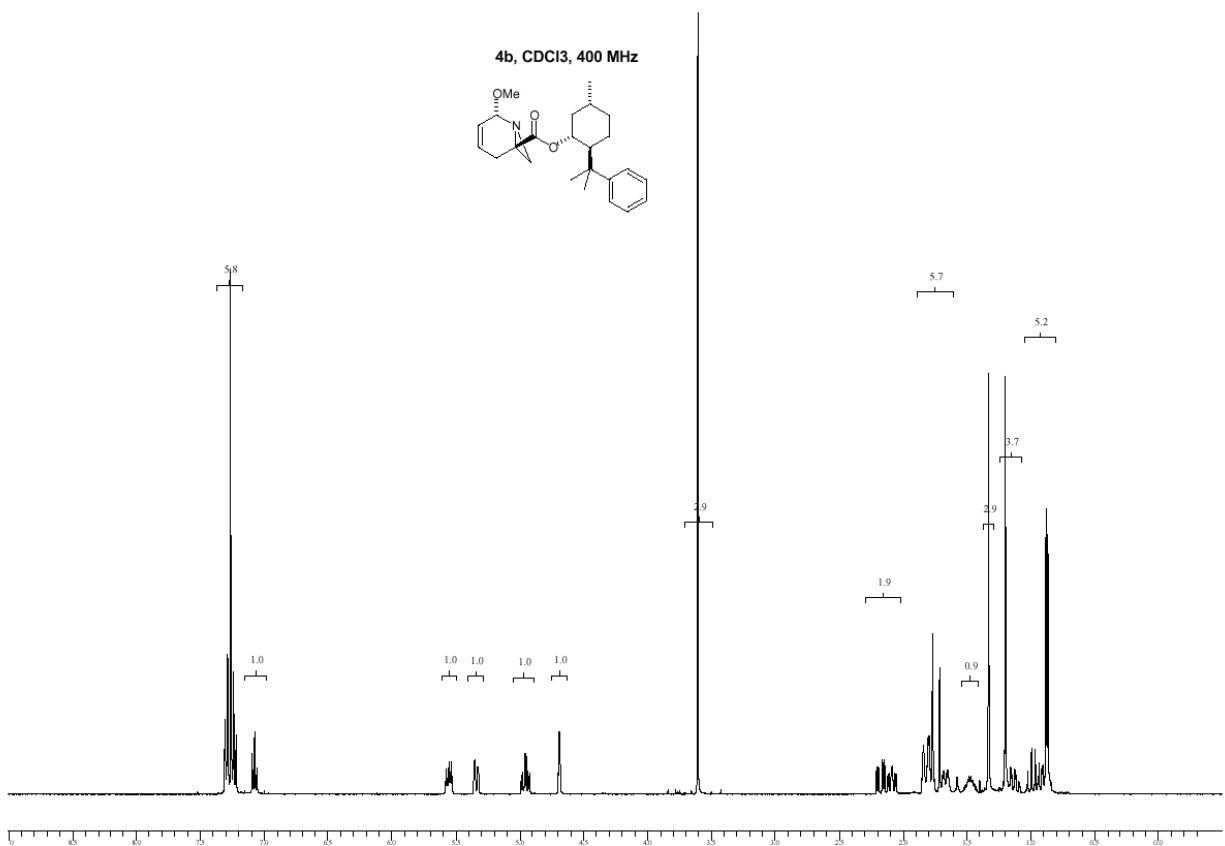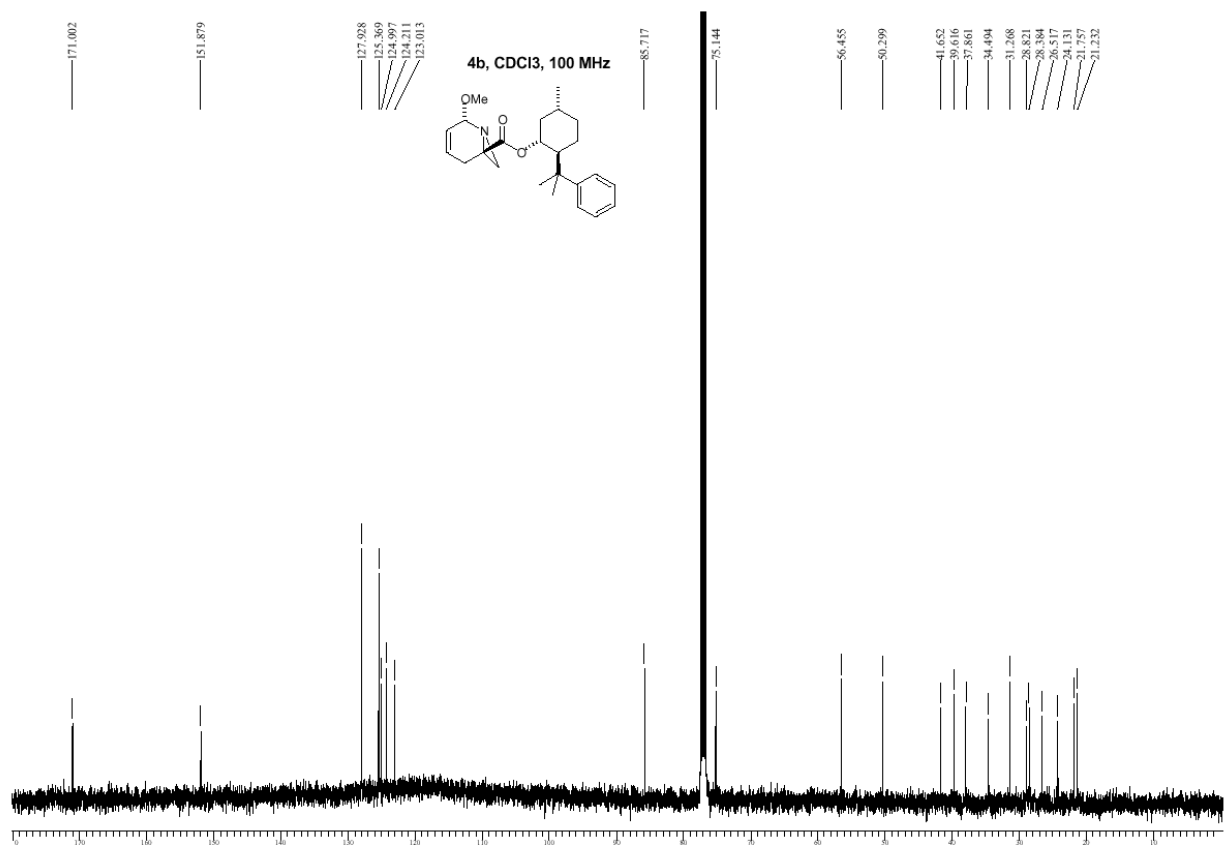



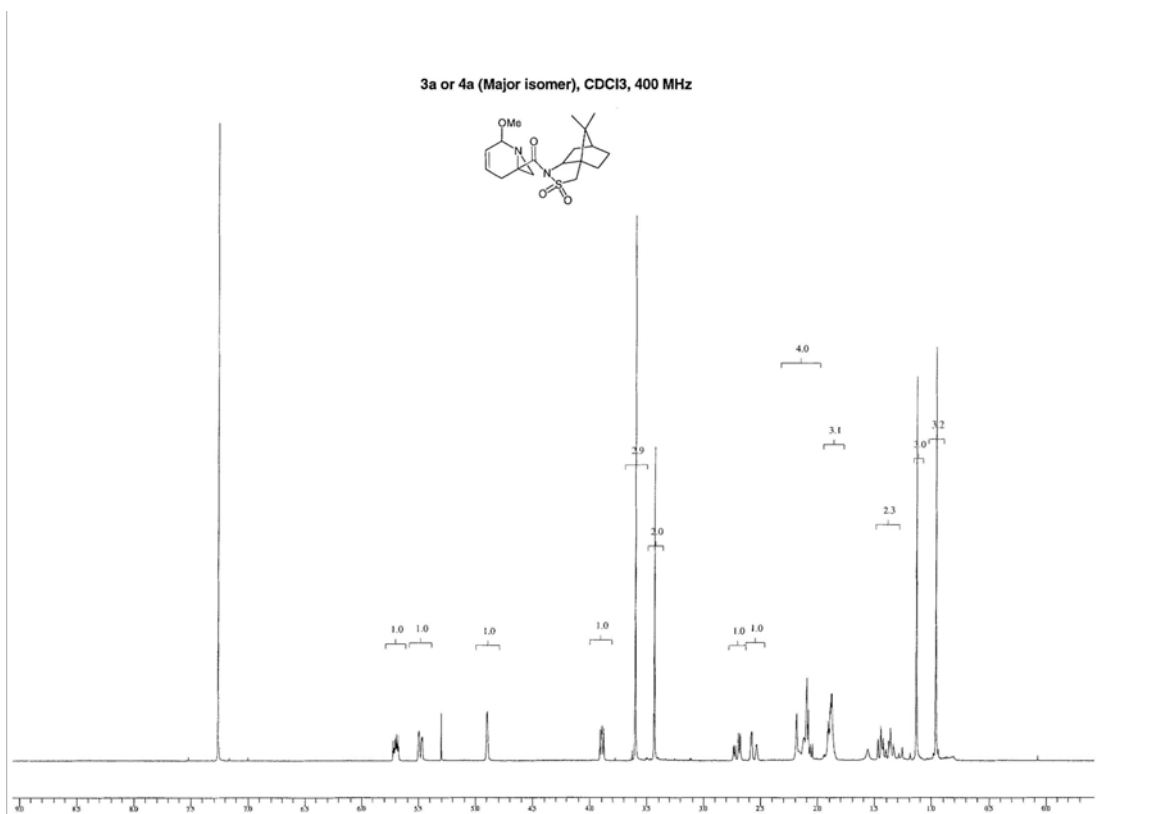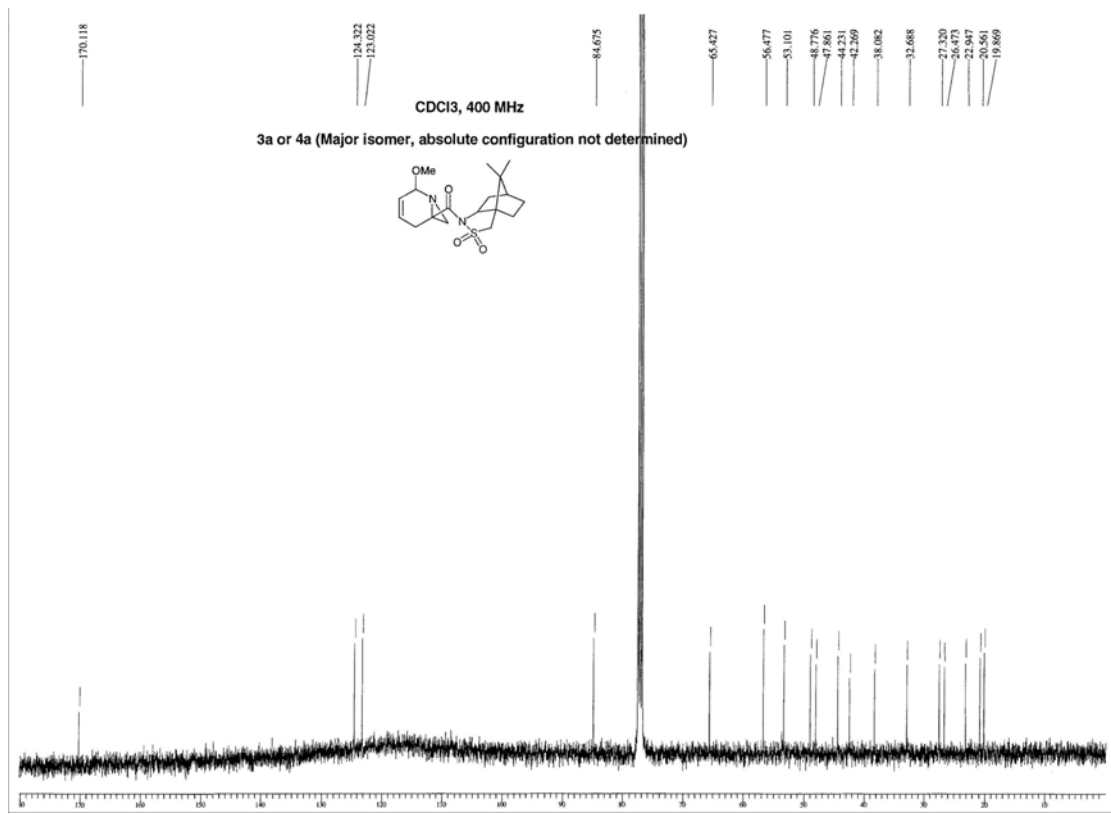

3a or 4a, Minor isomer, CDCl<sub>3</sub>, 500 MHz

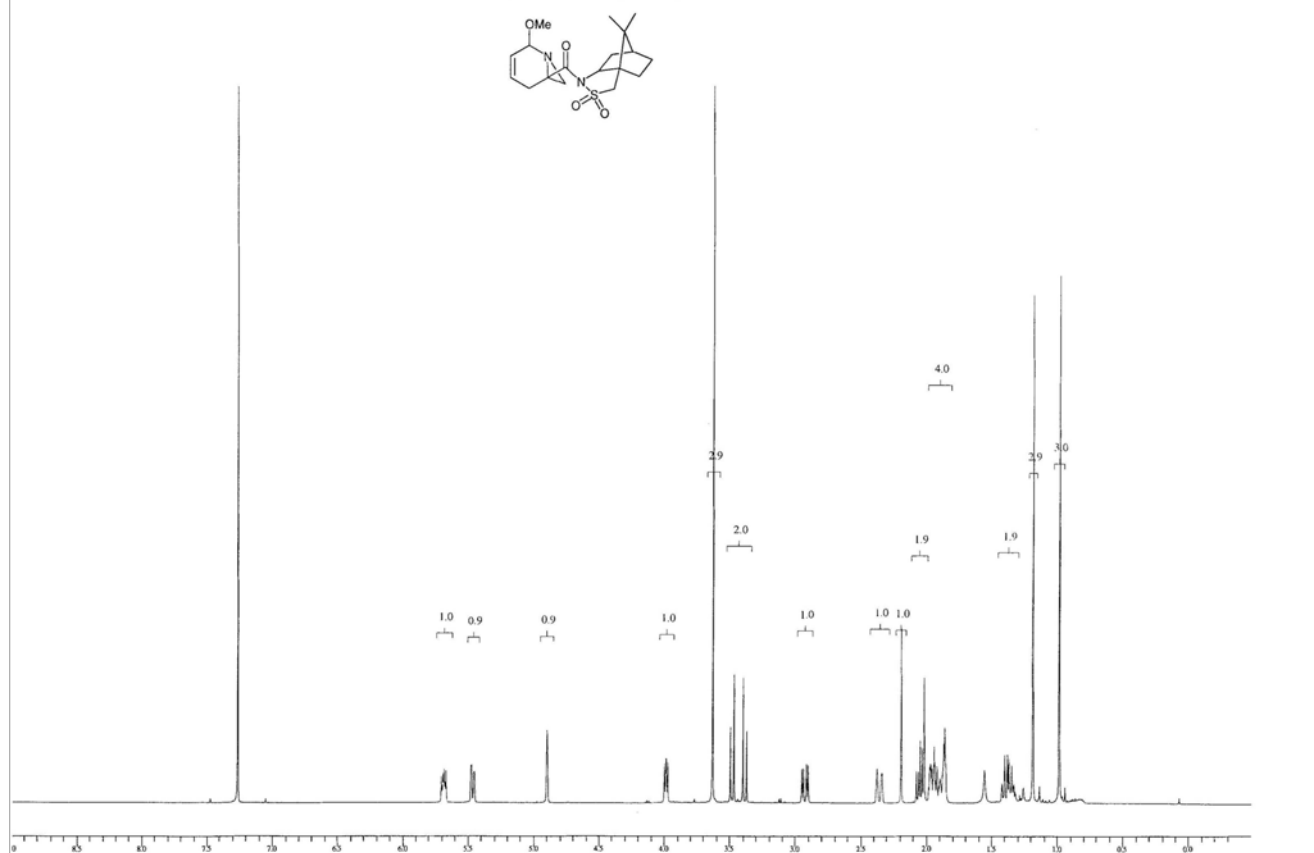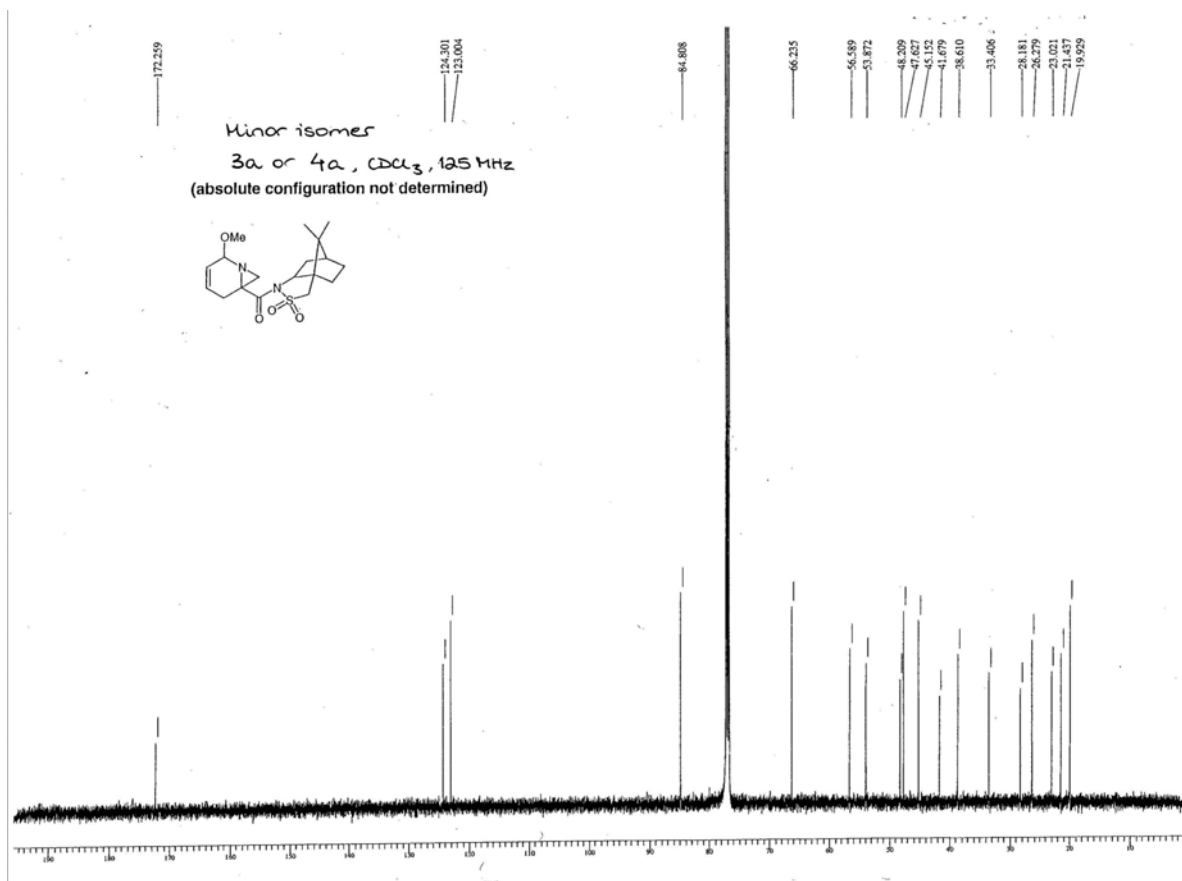

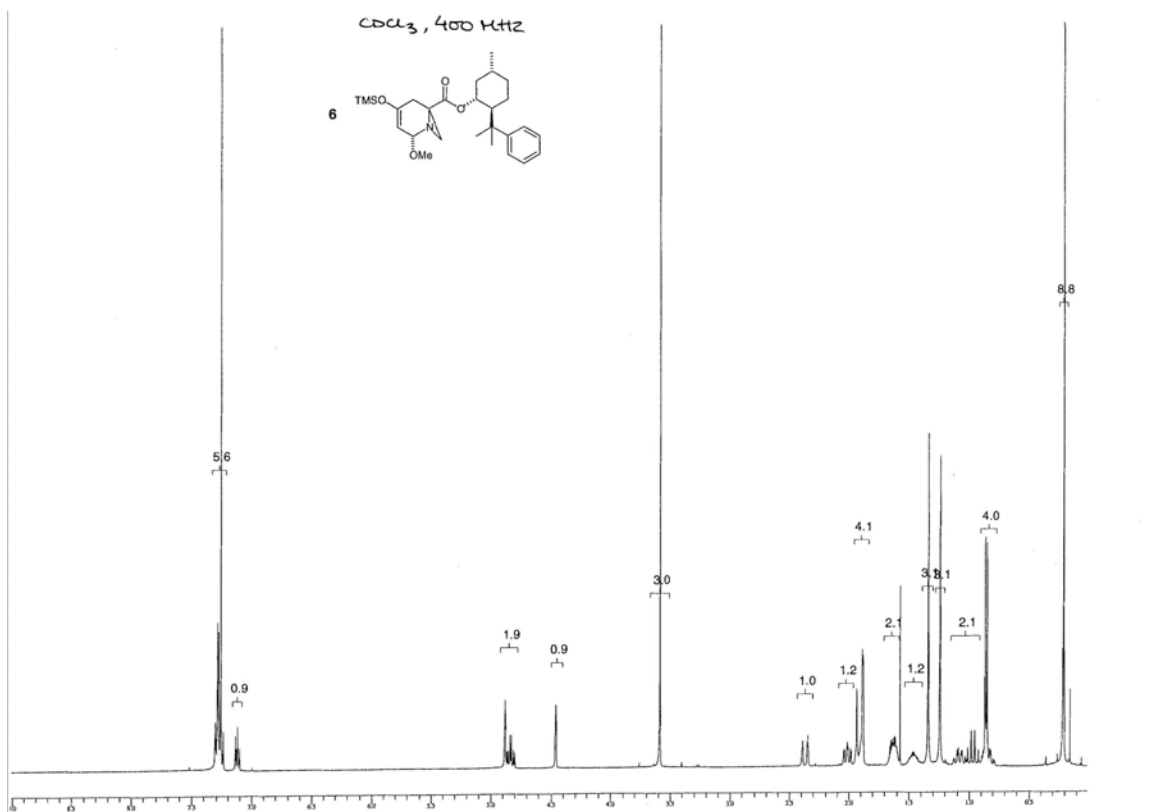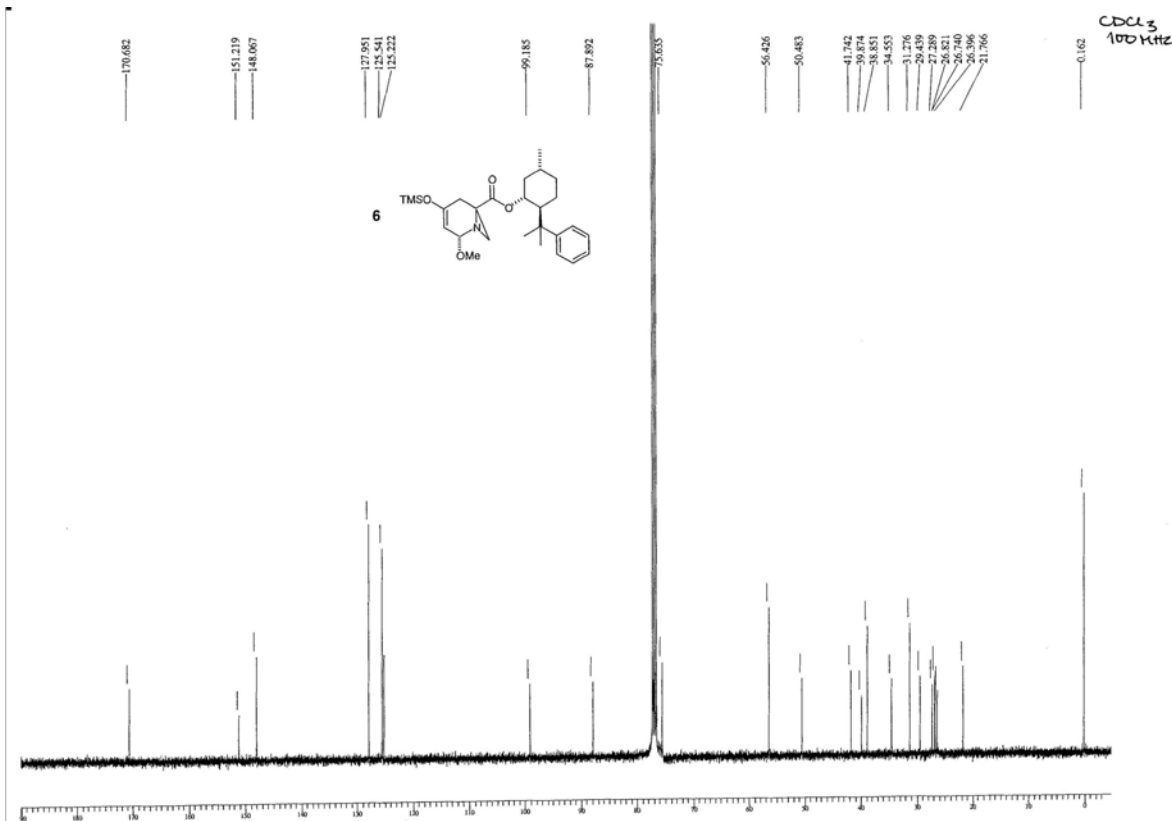

7, CDCl<sub>3</sub>, 500 MHz

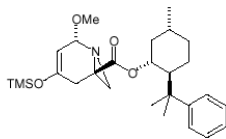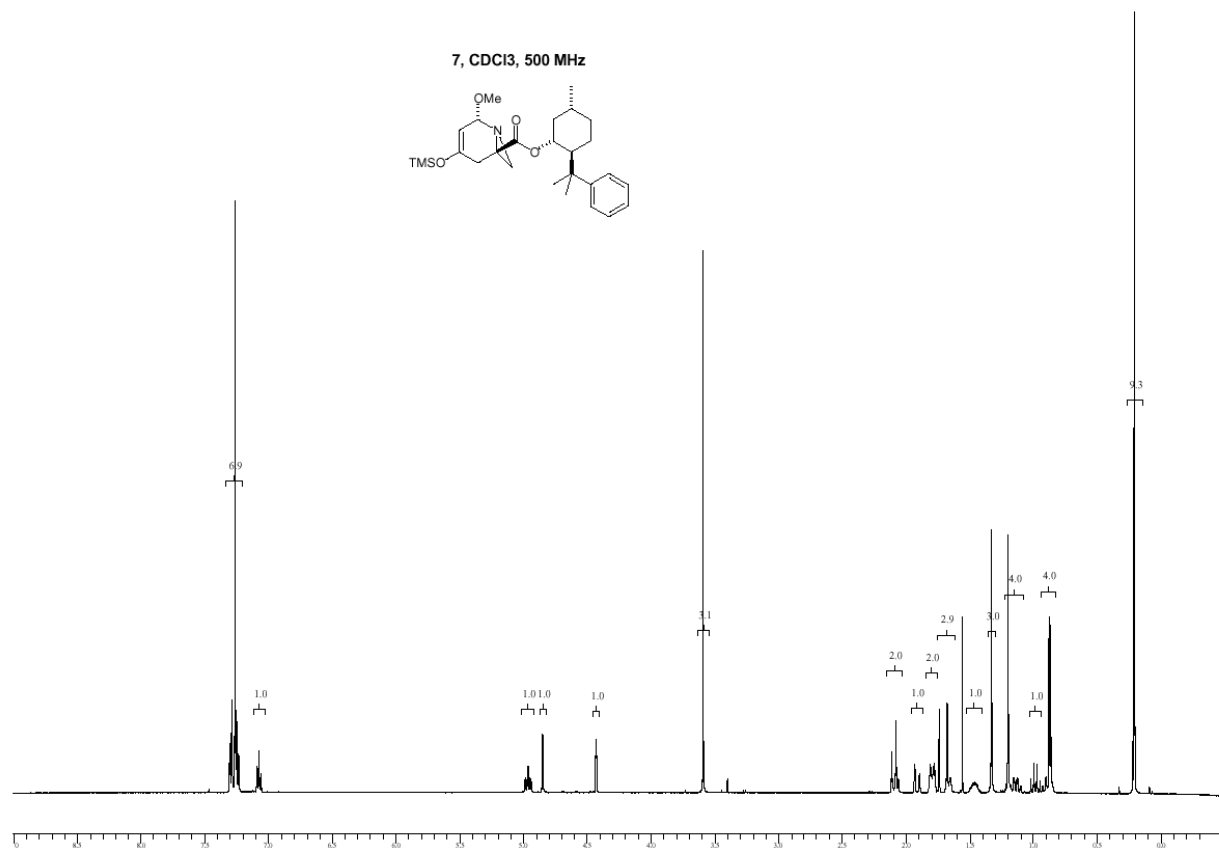

7, CDCl<sub>3</sub>, 125 MHz

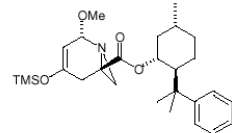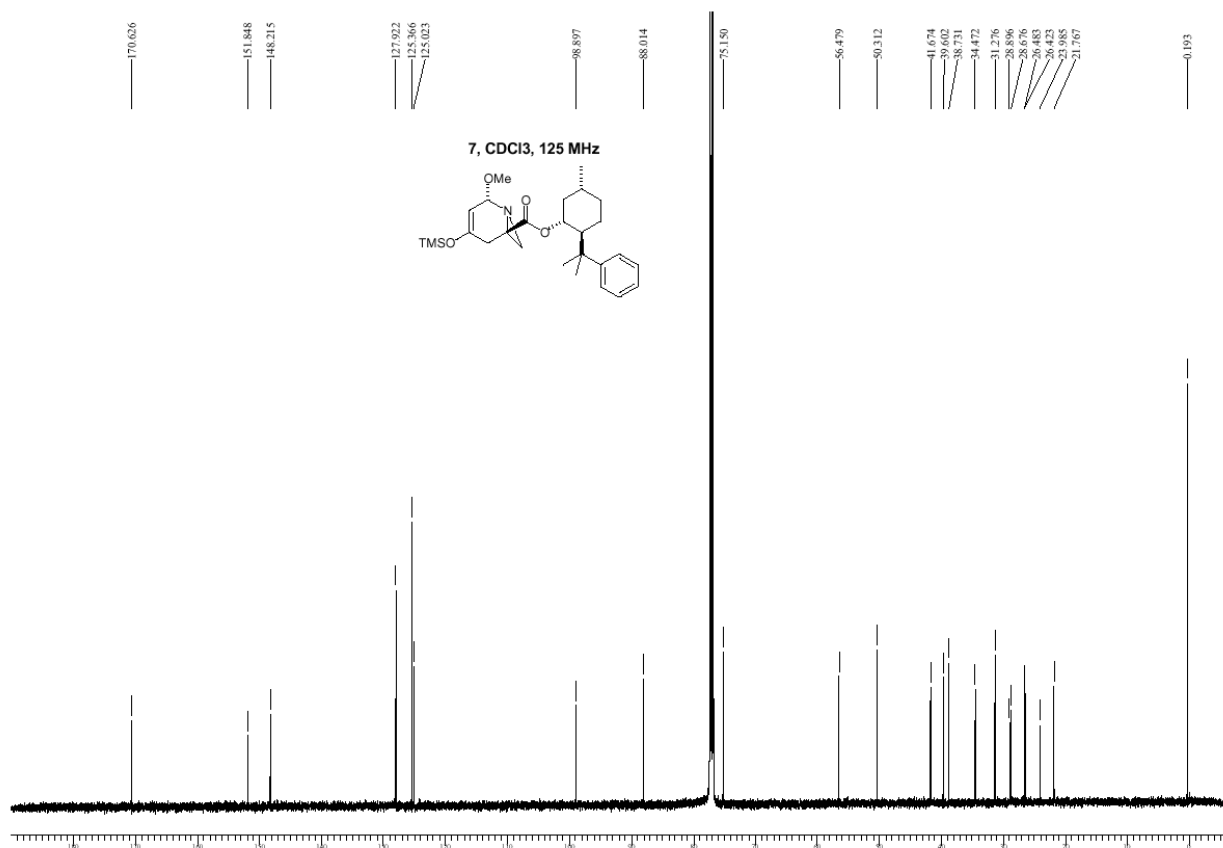

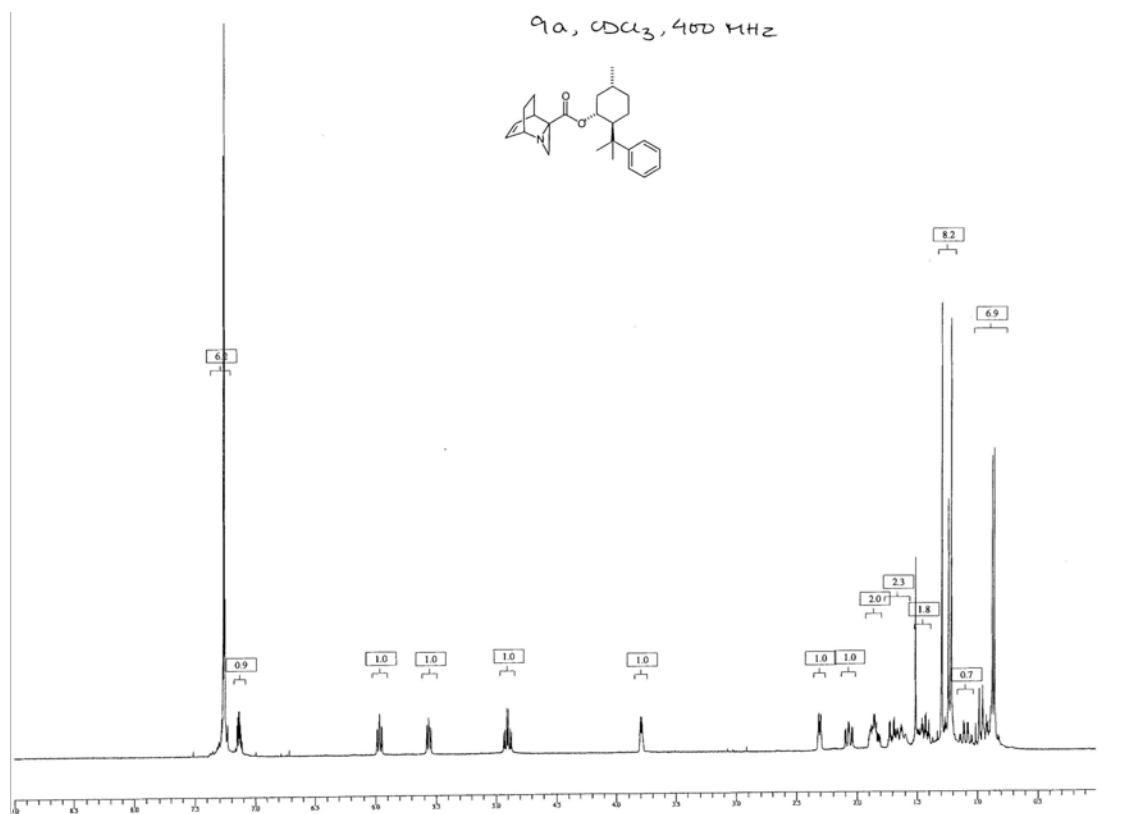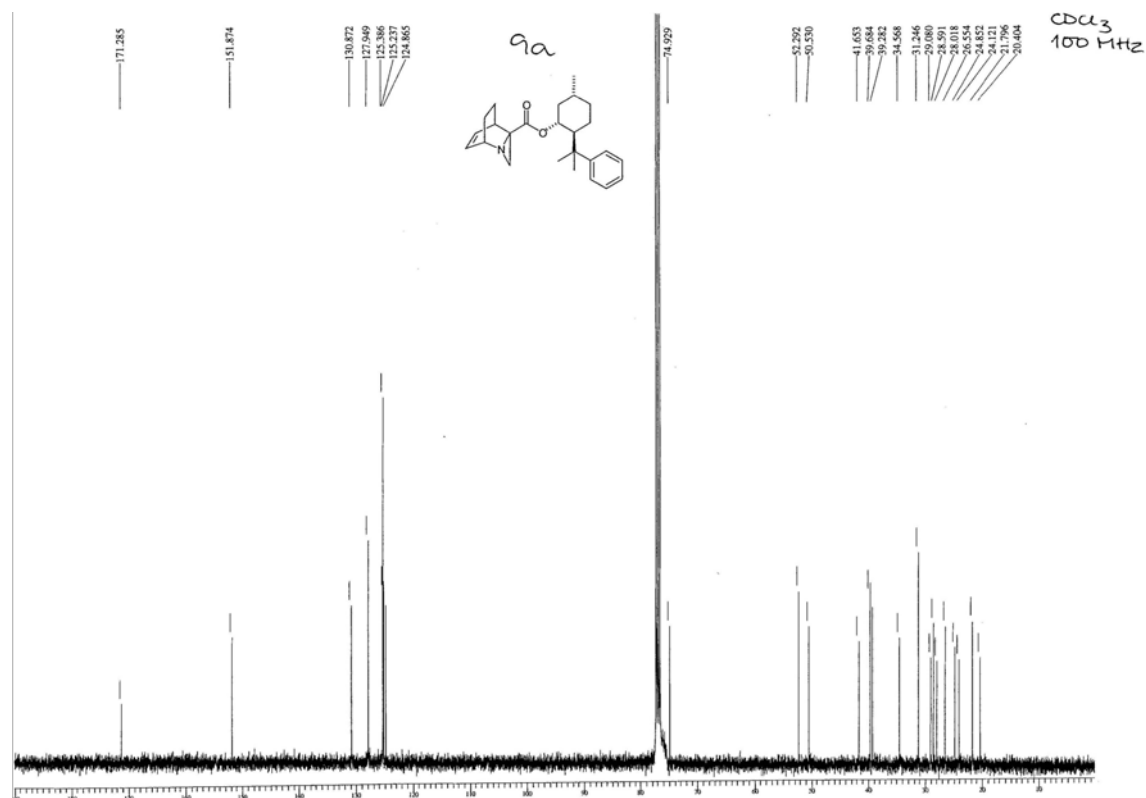

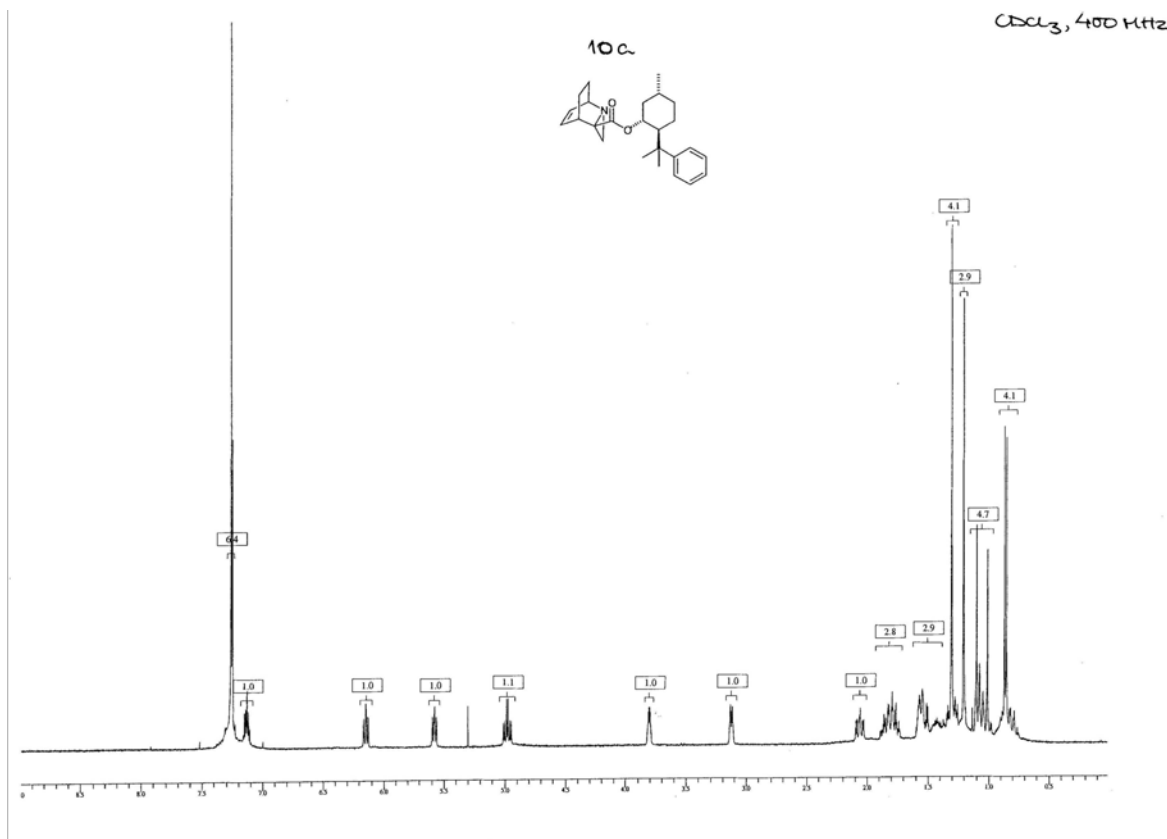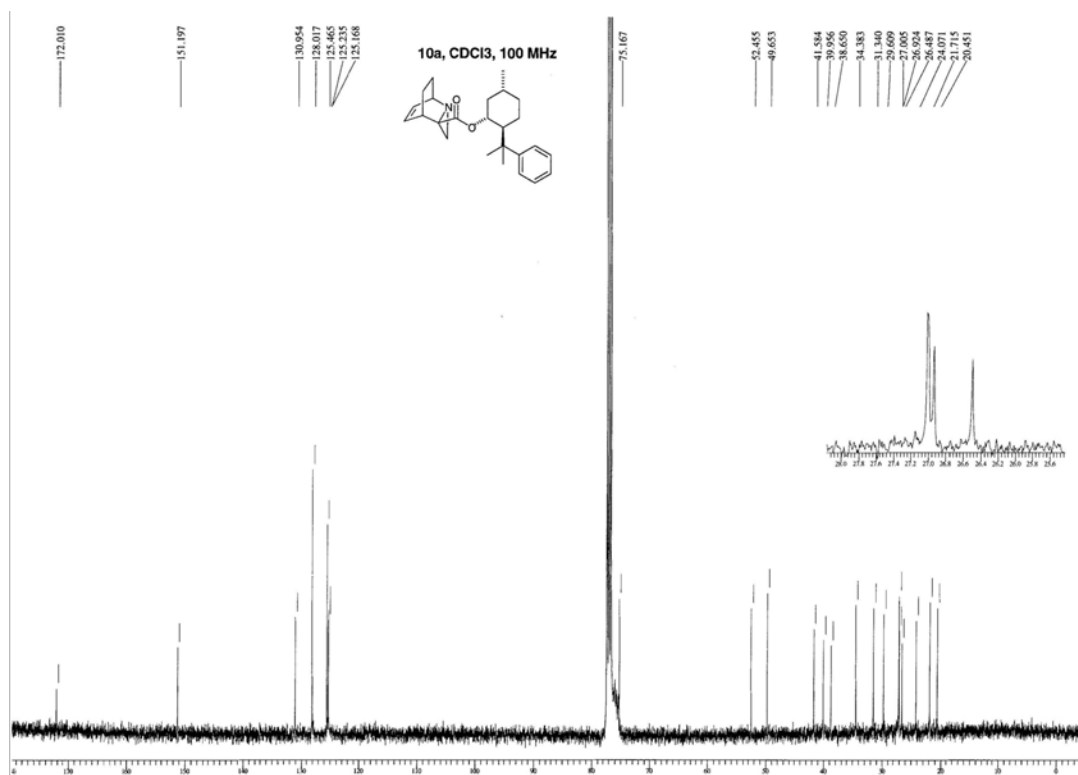

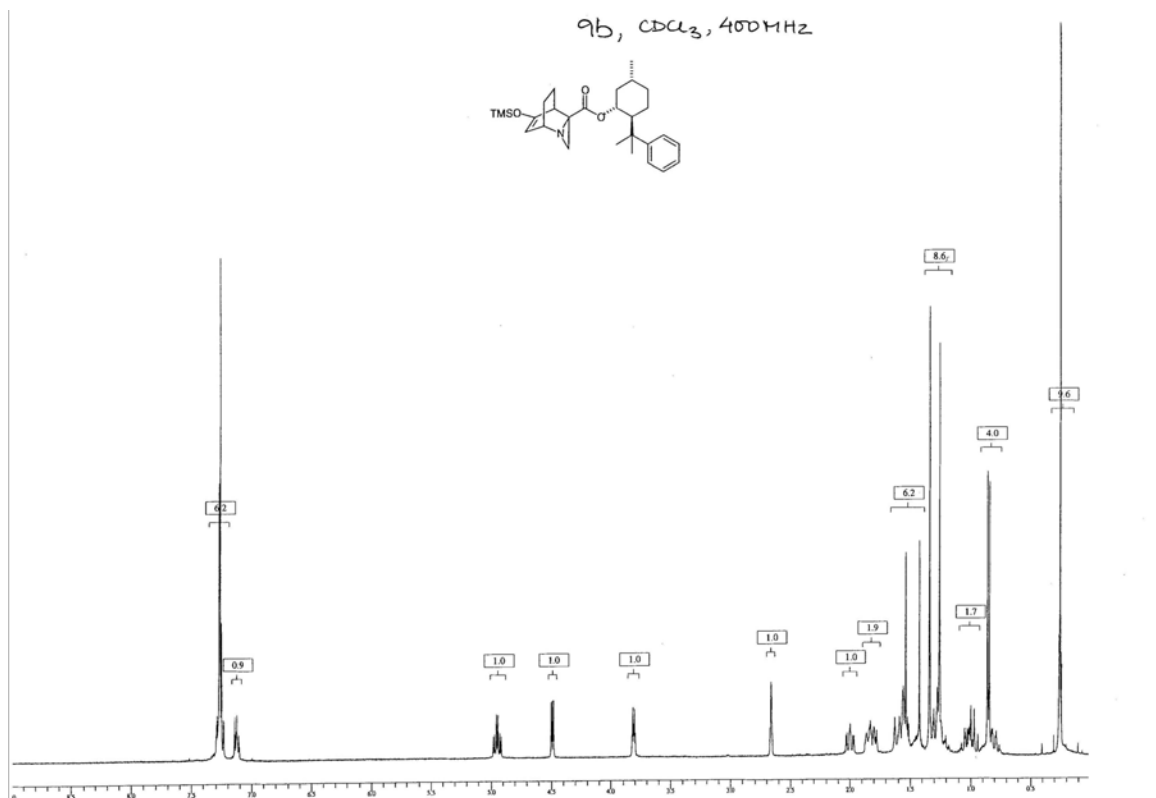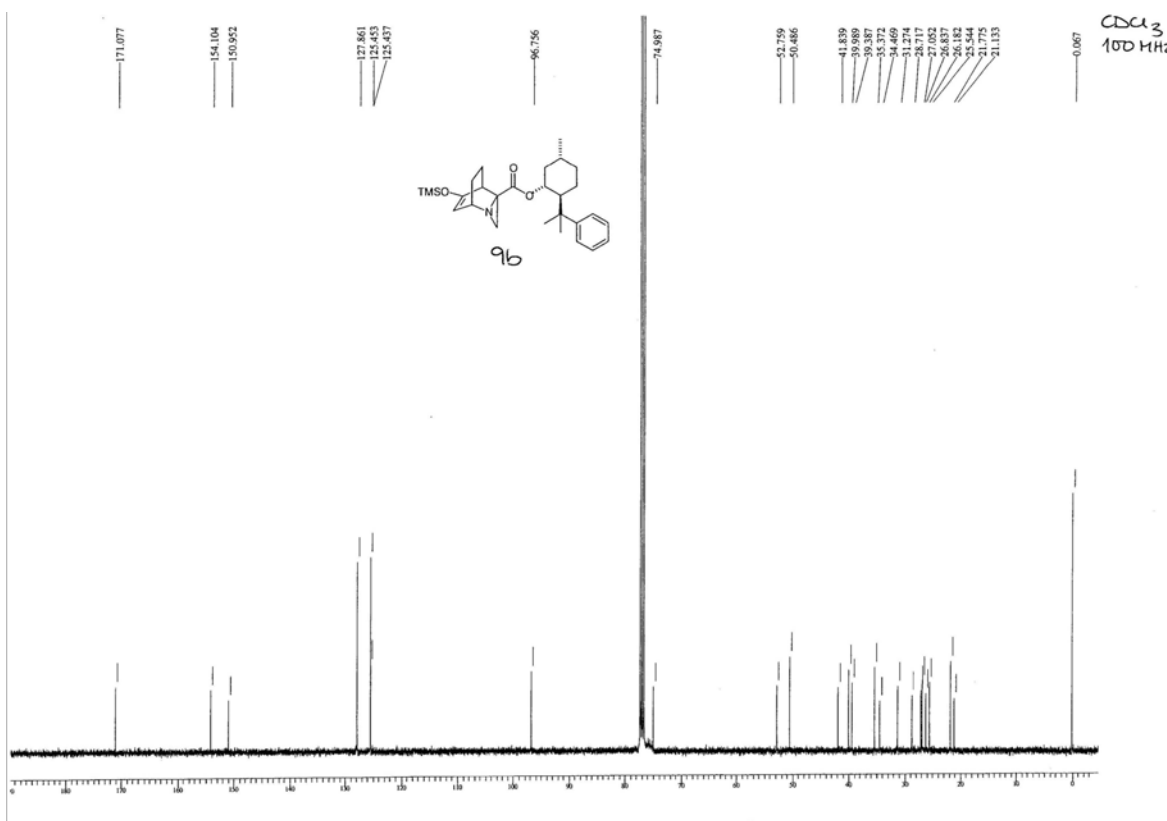

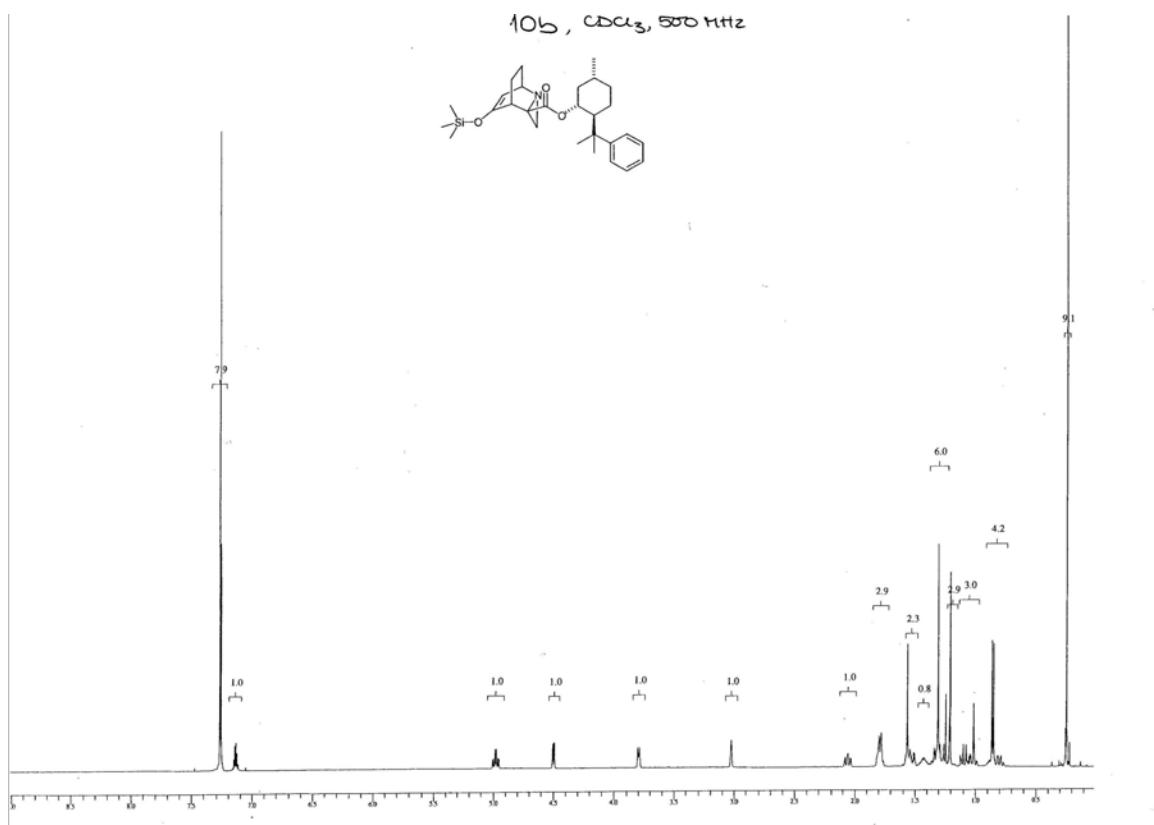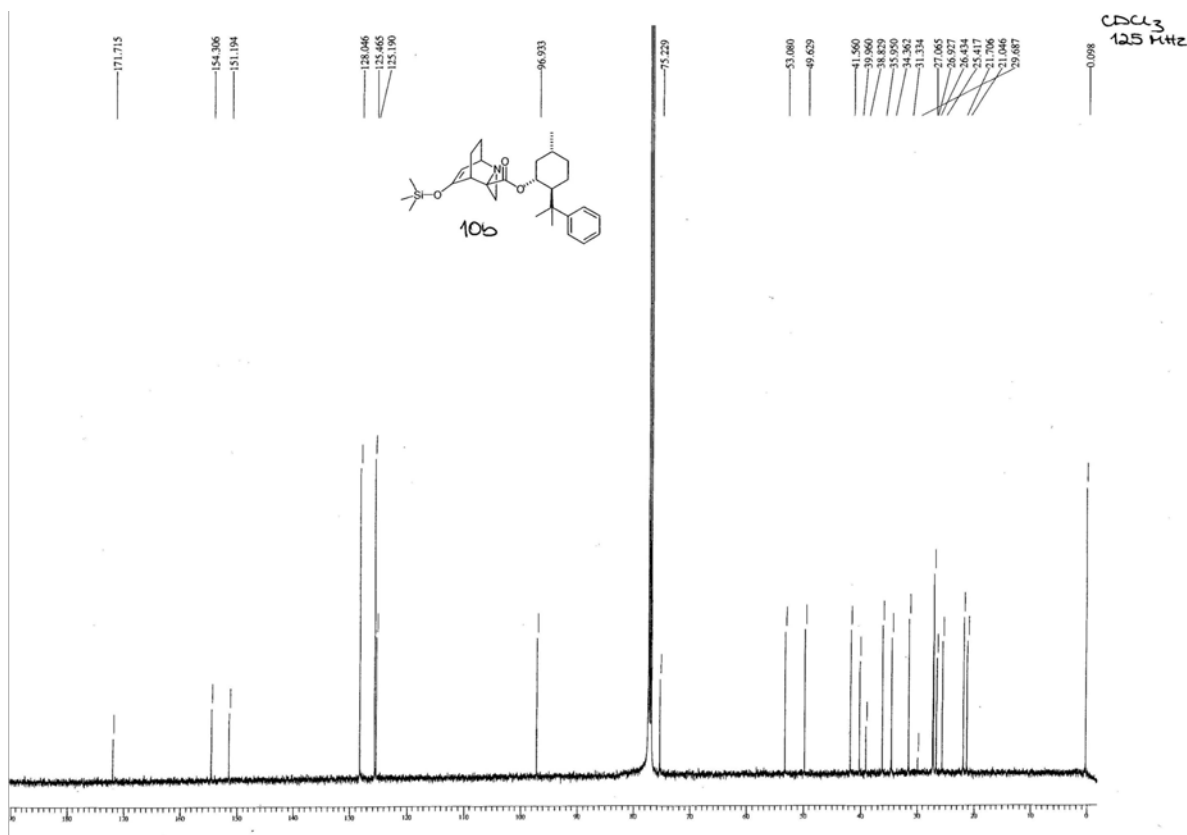



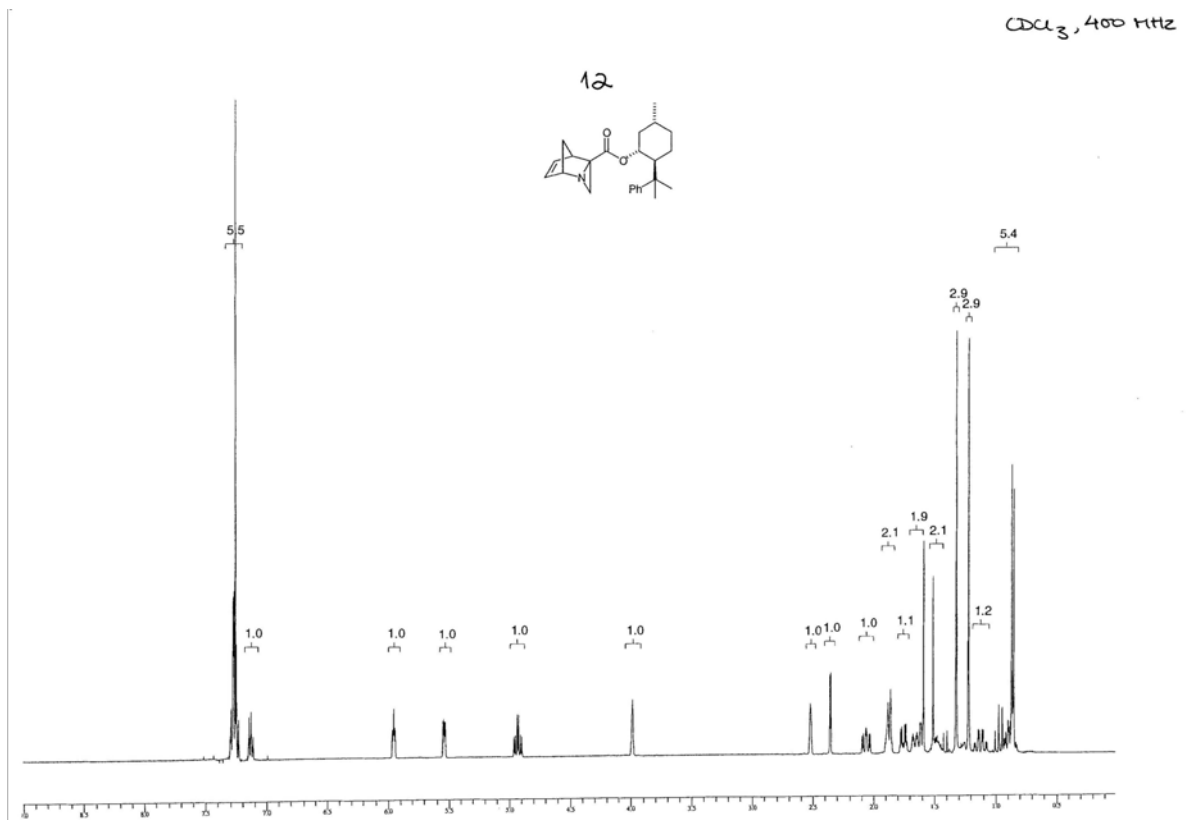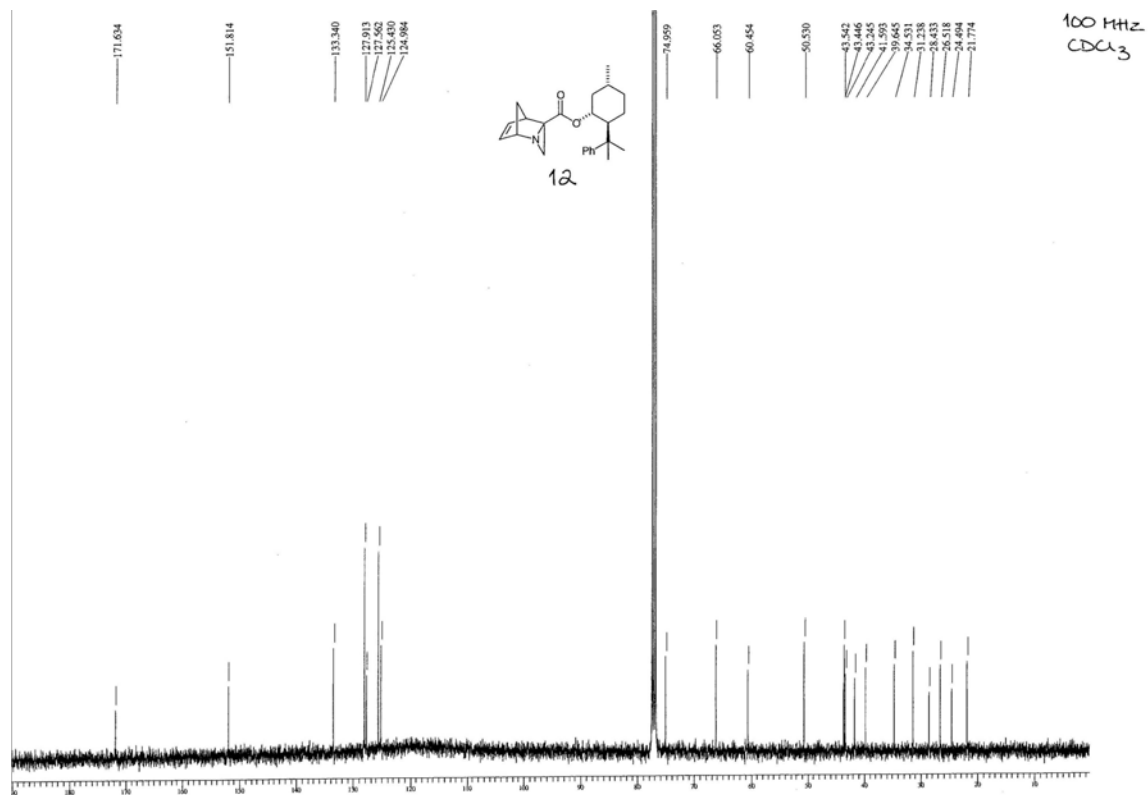

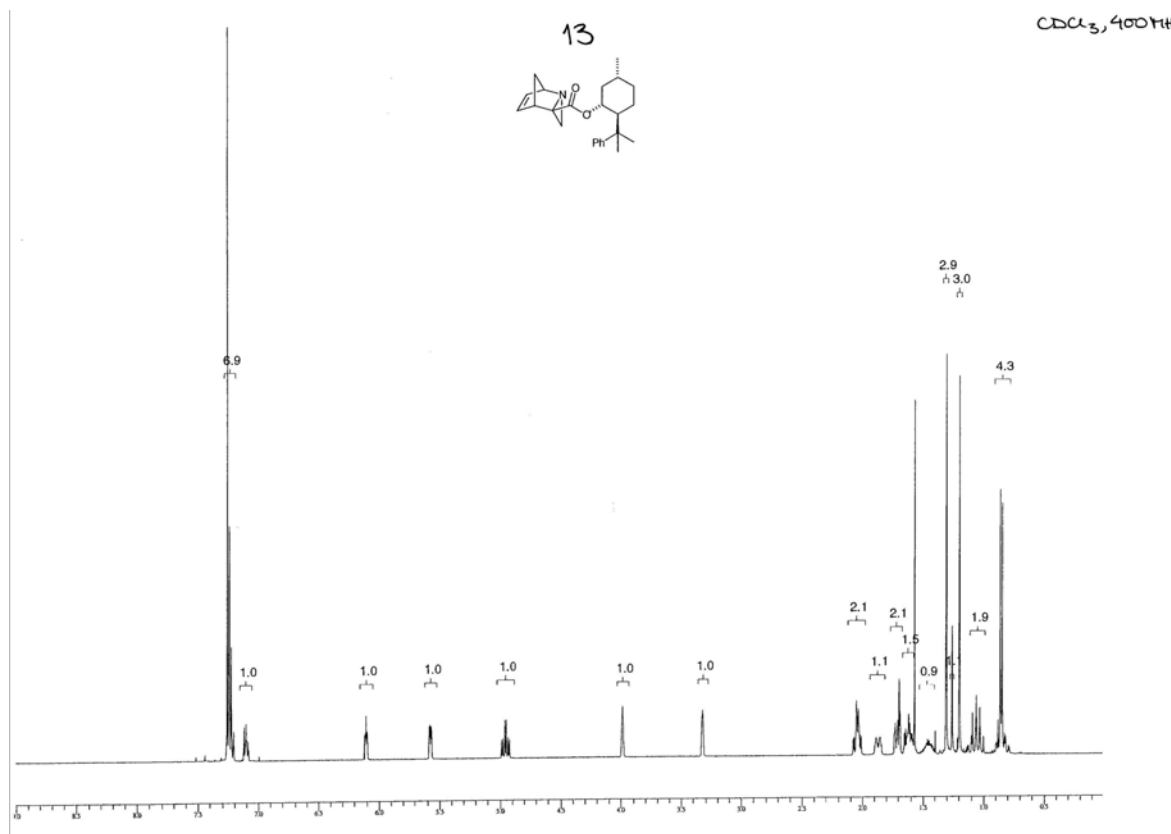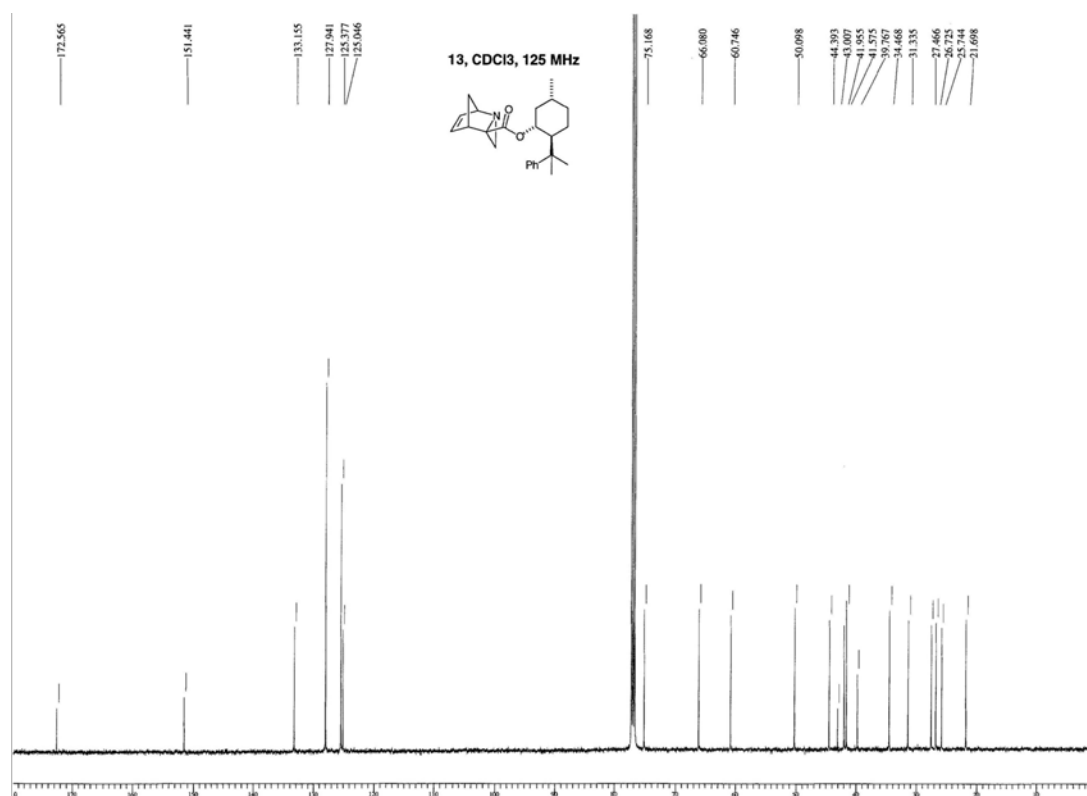

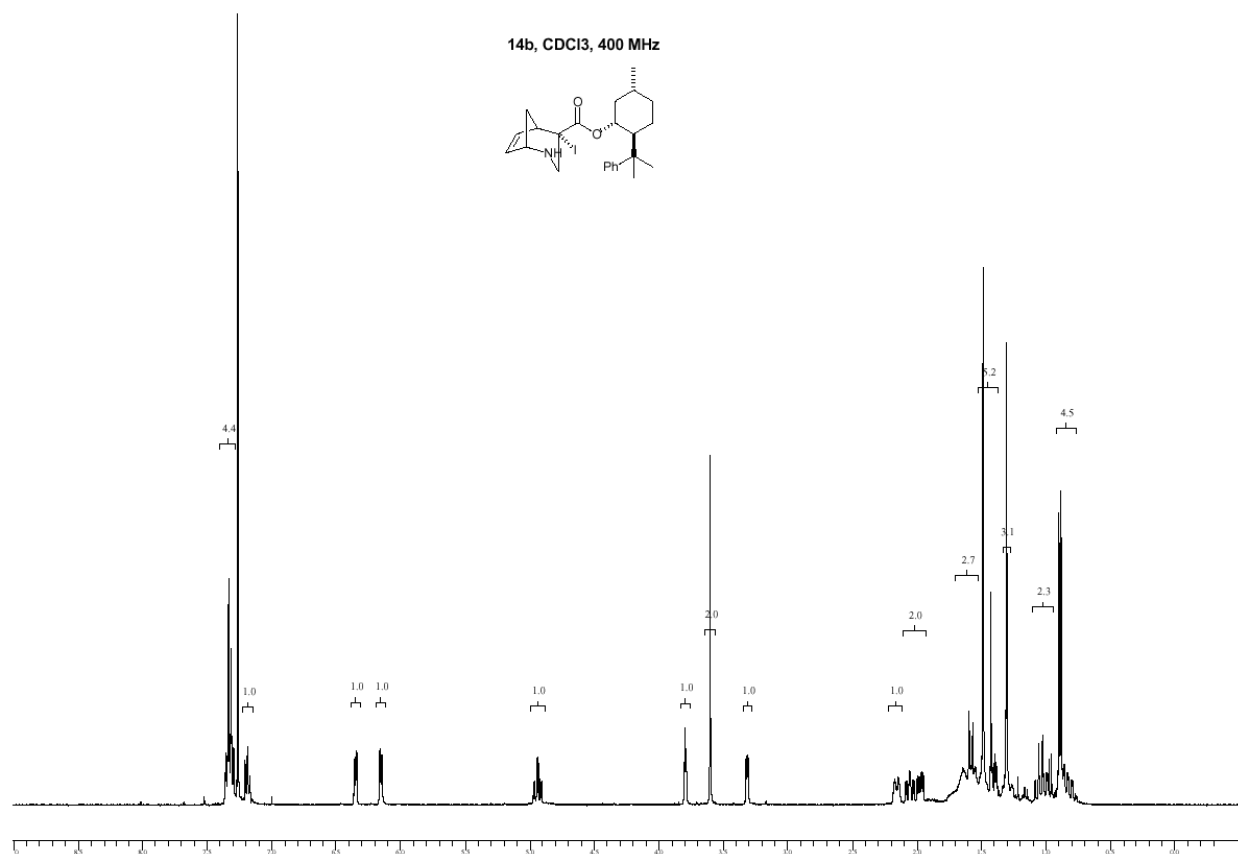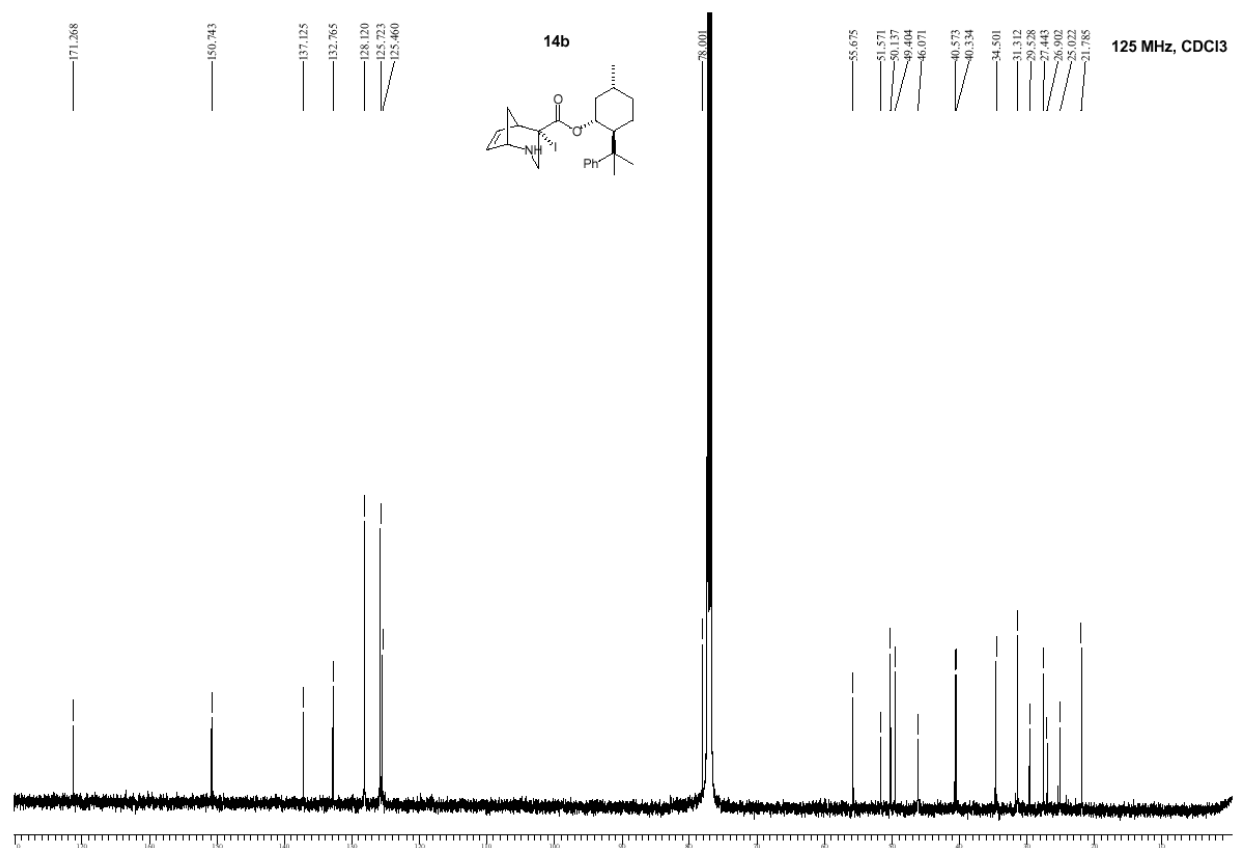

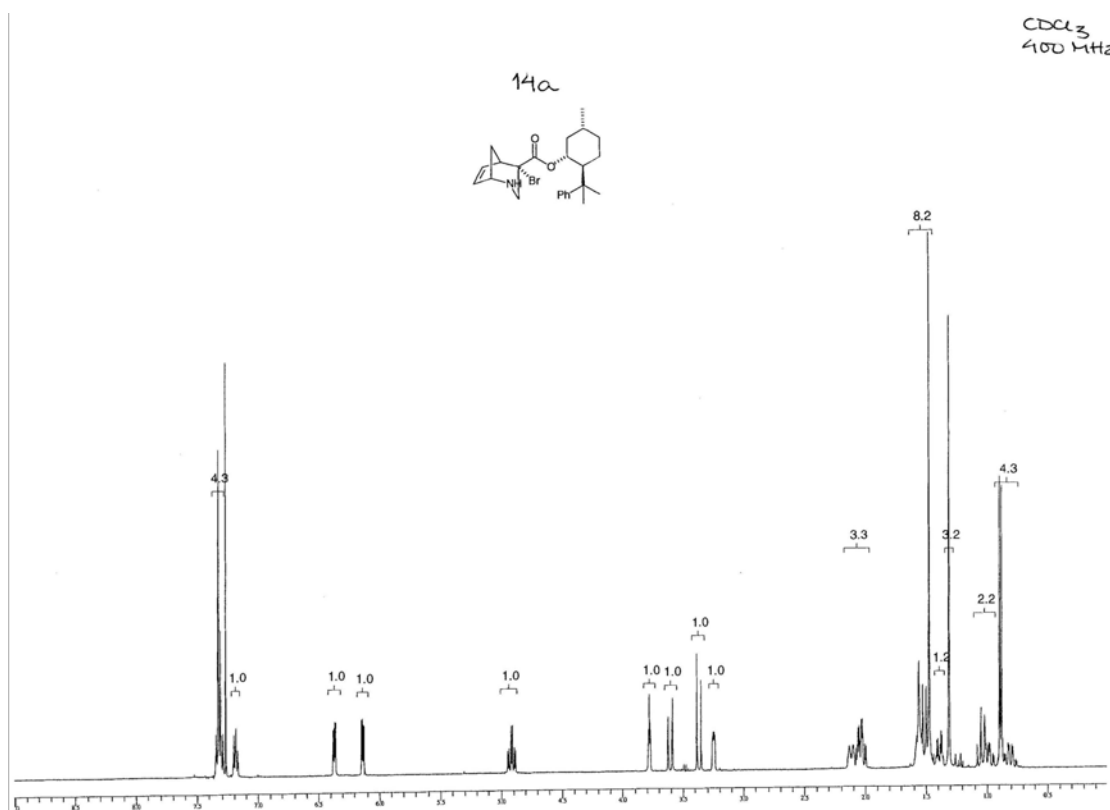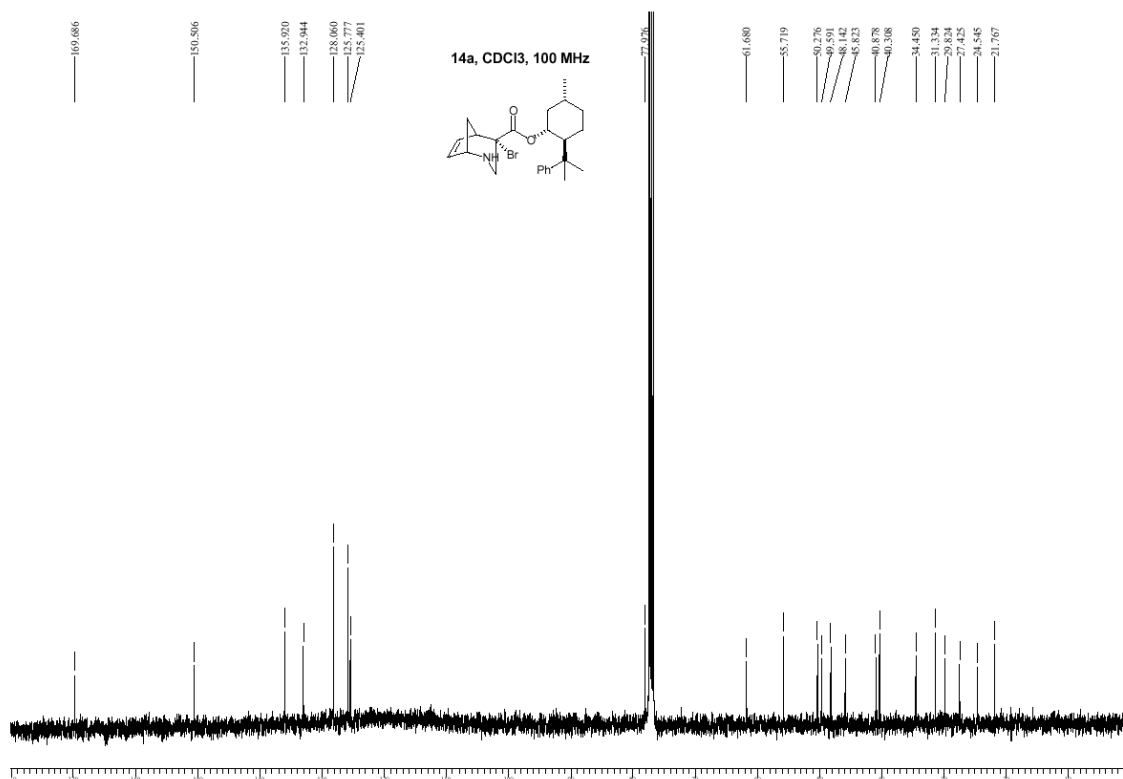

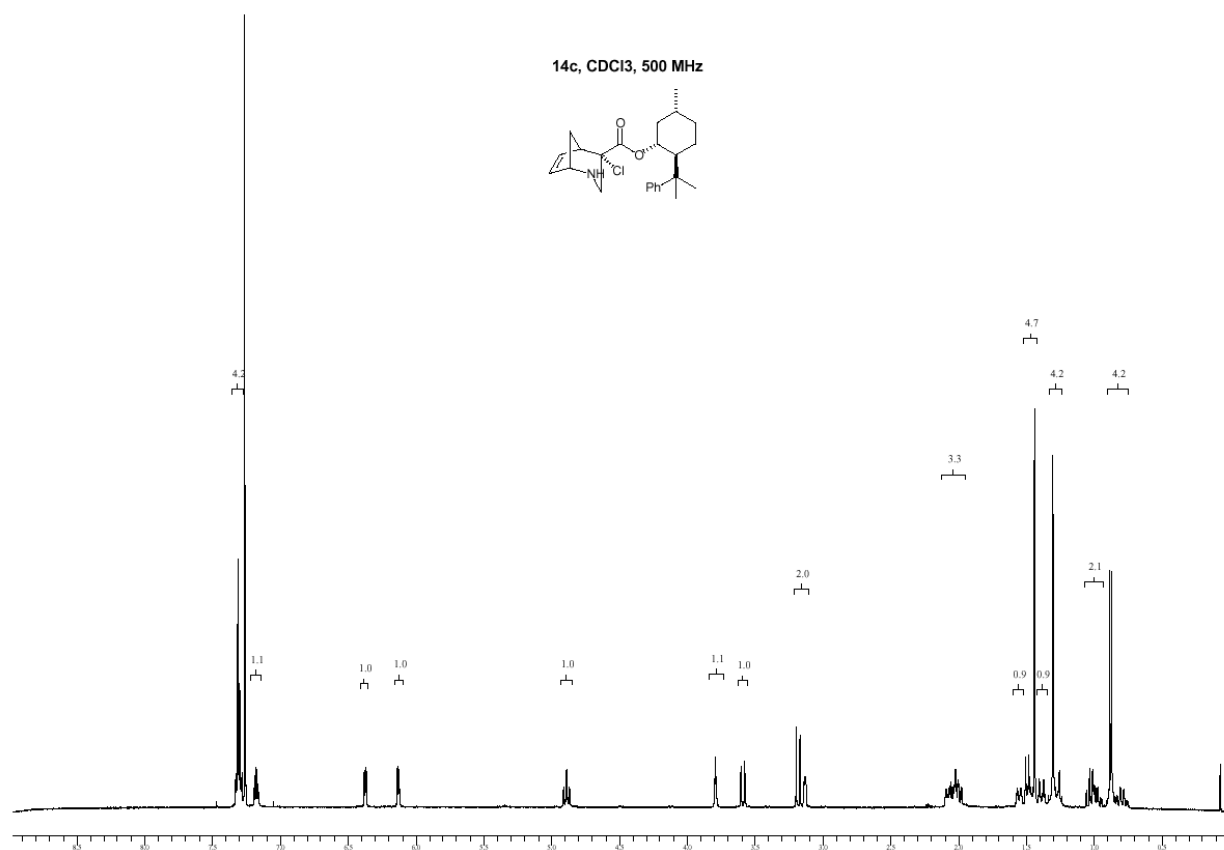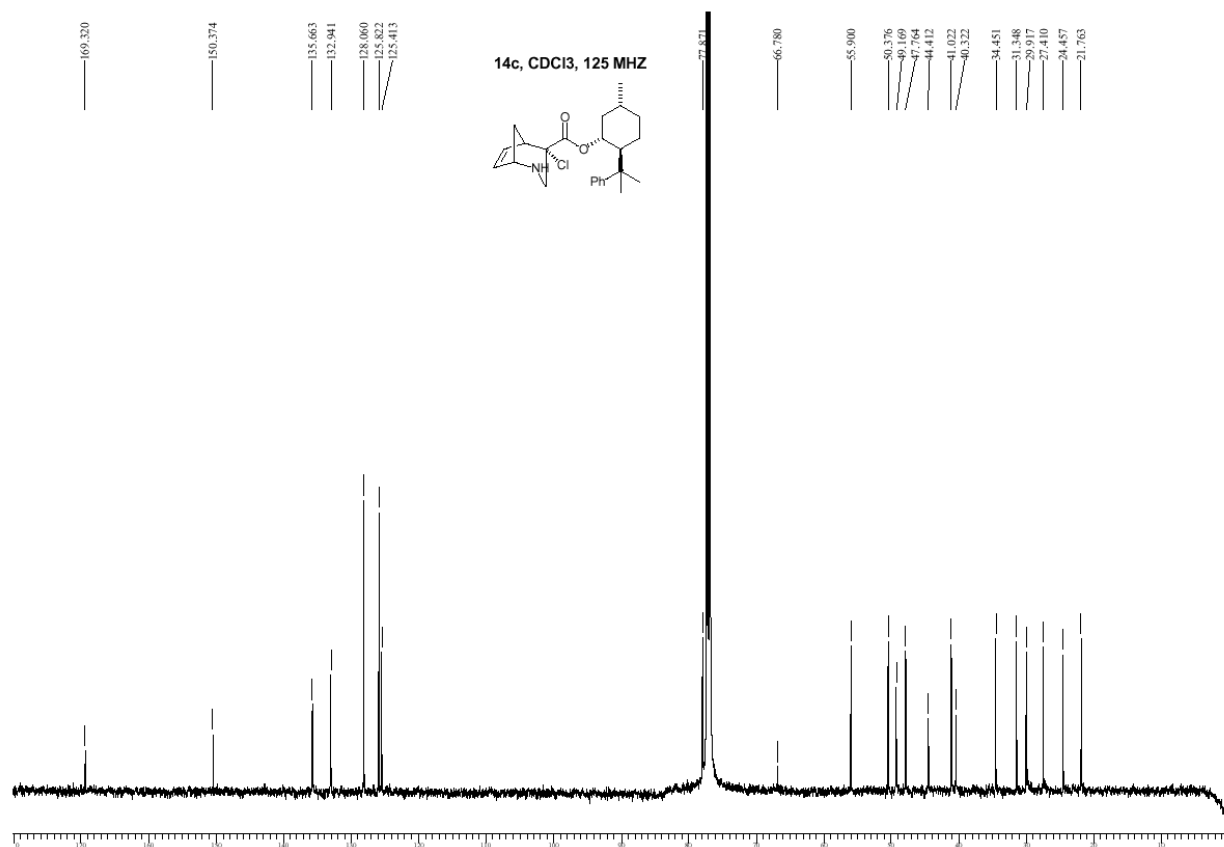

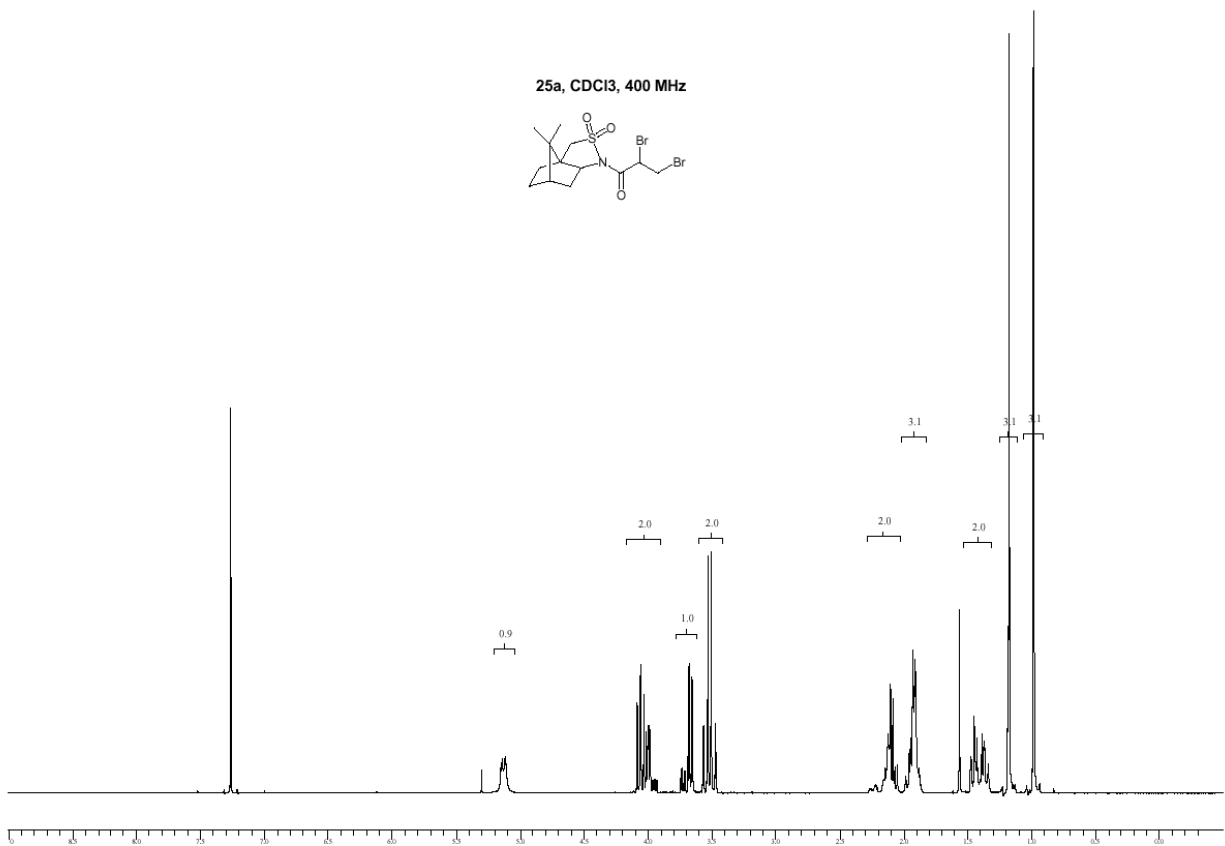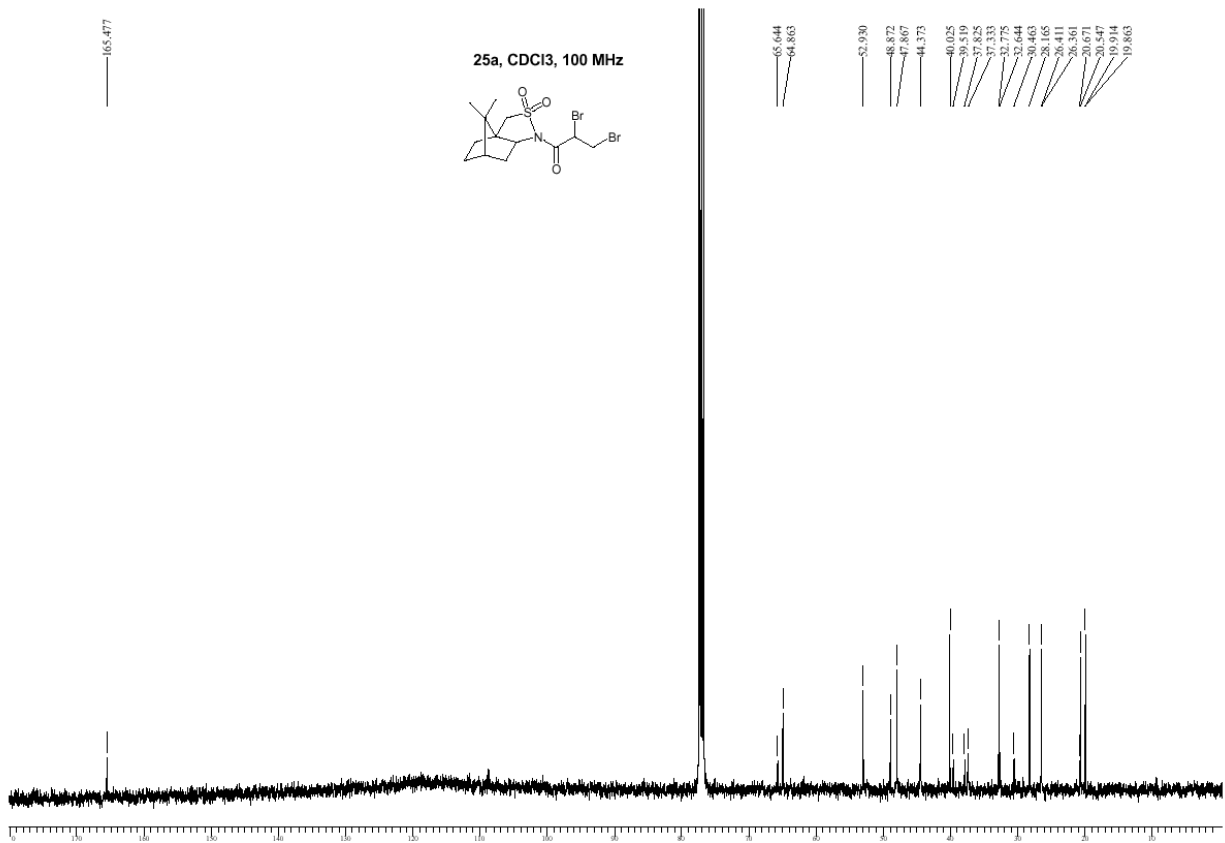

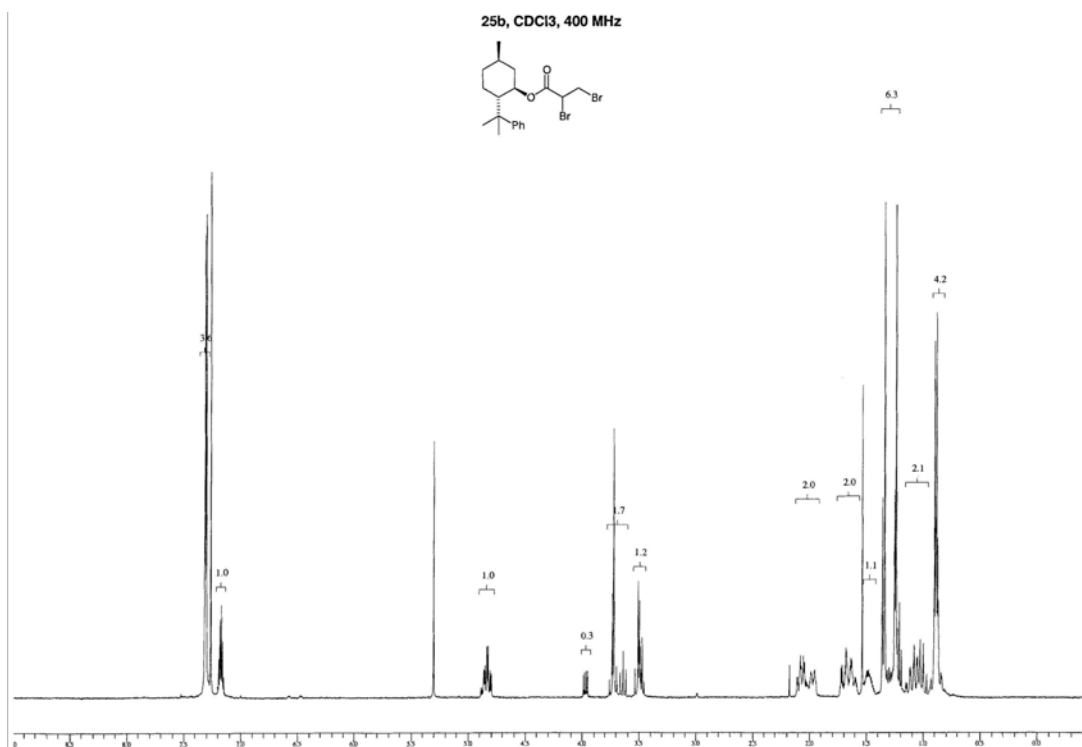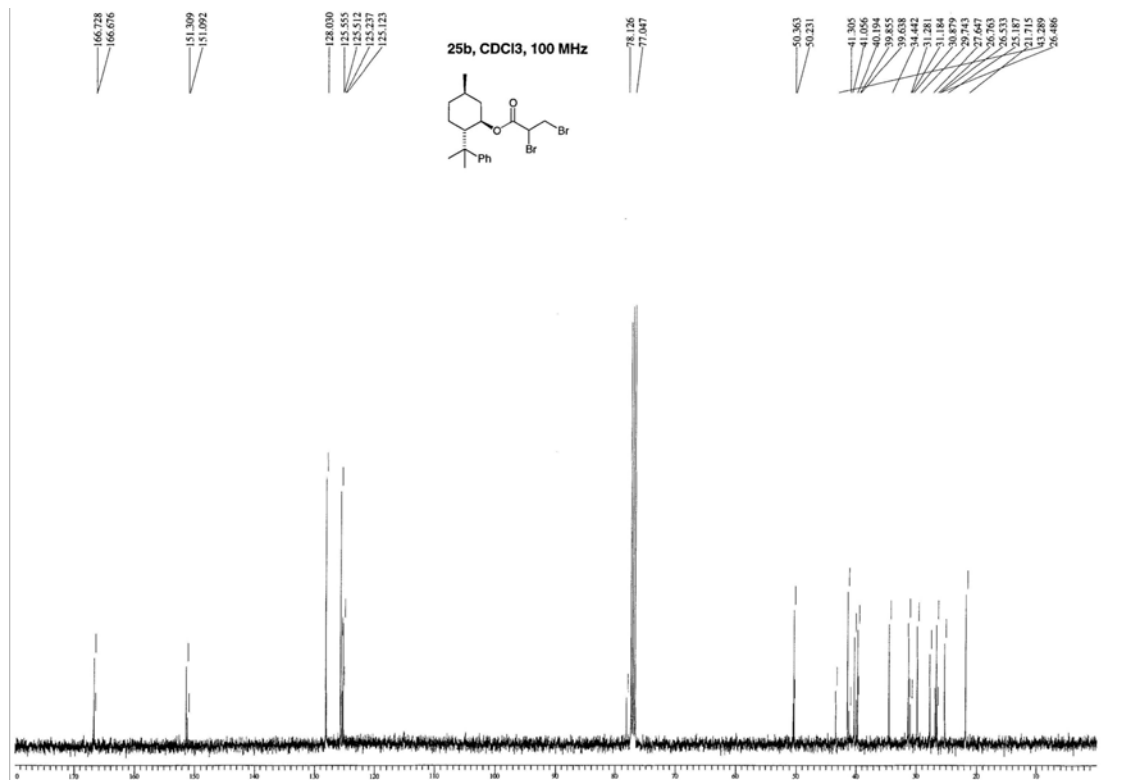

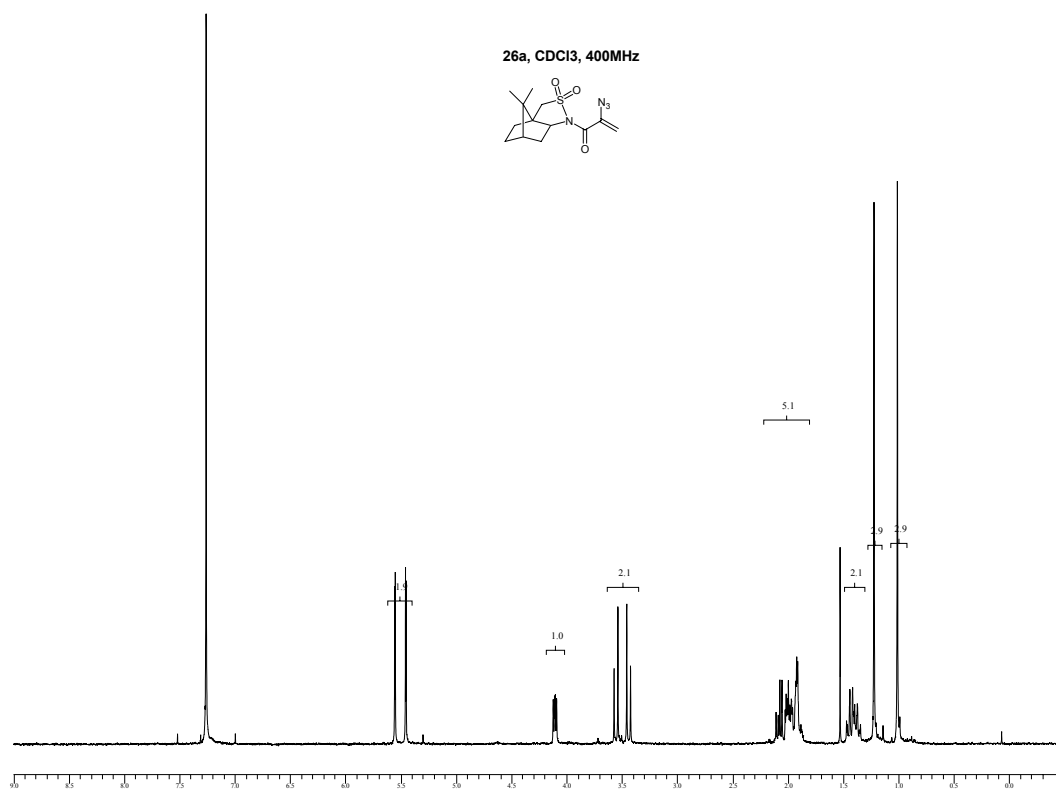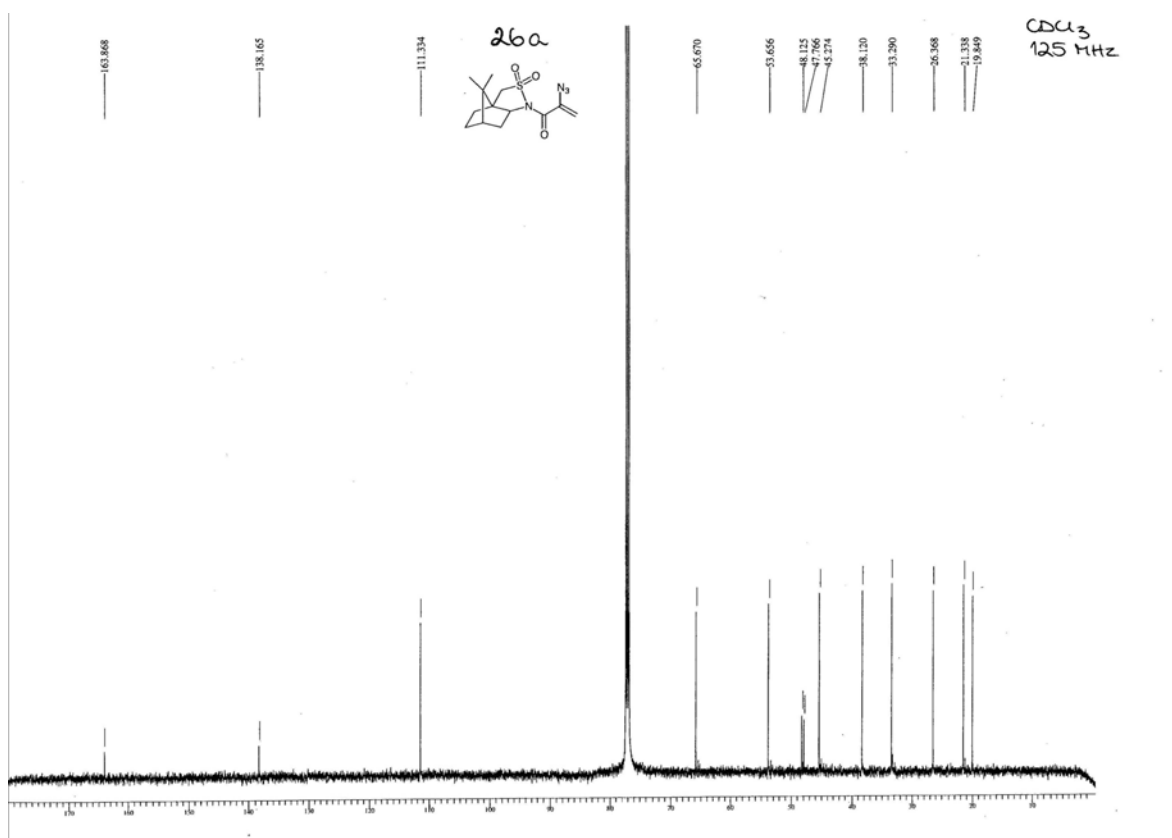



26b, CDCl<sub>3</sub>, 400 MHz

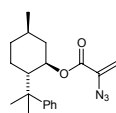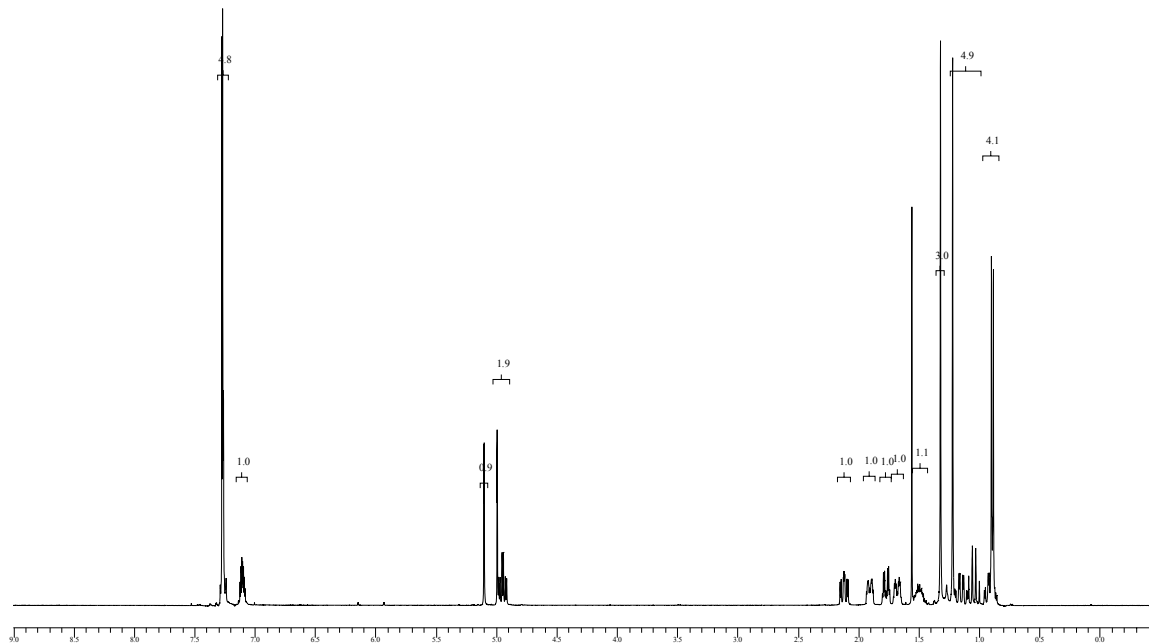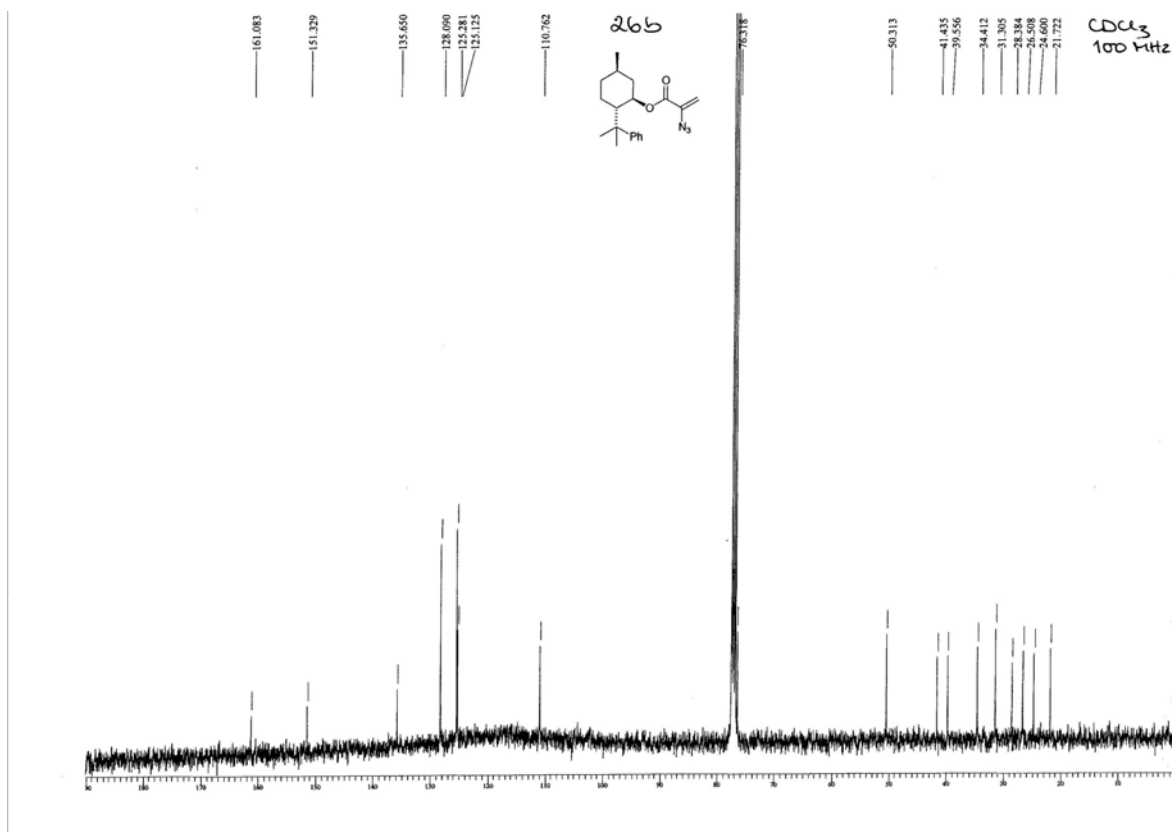

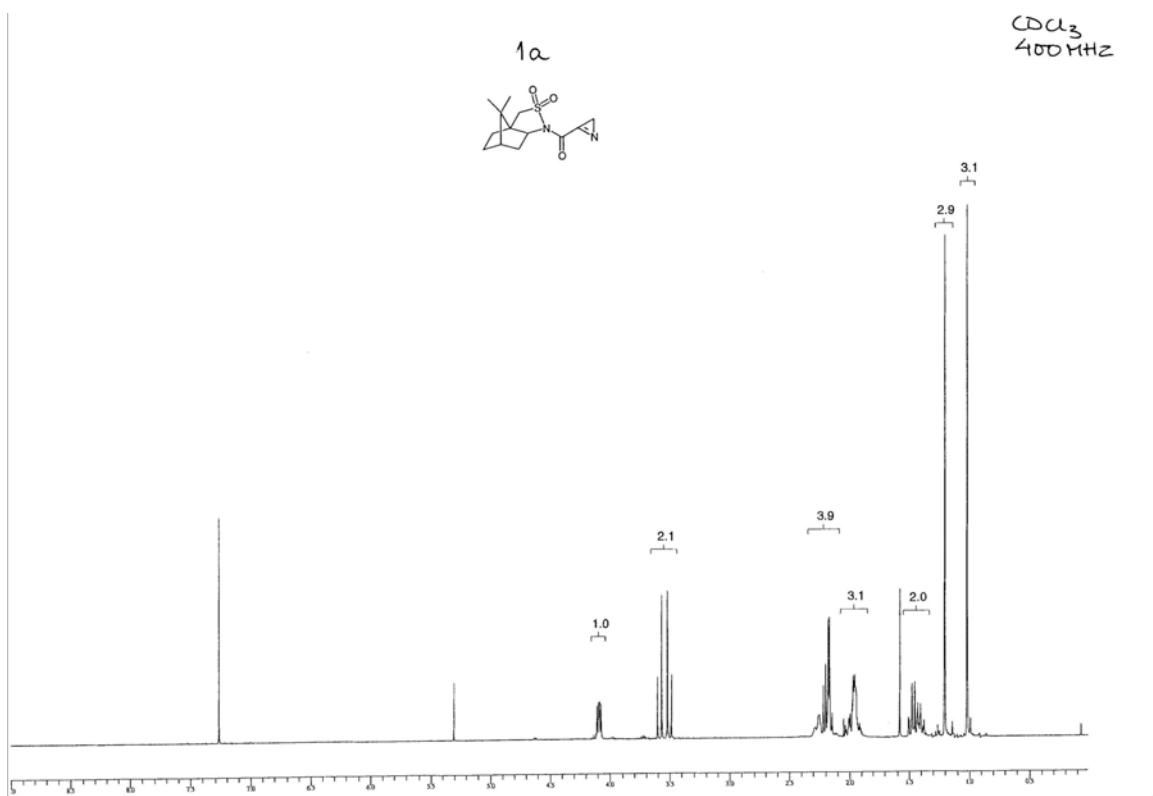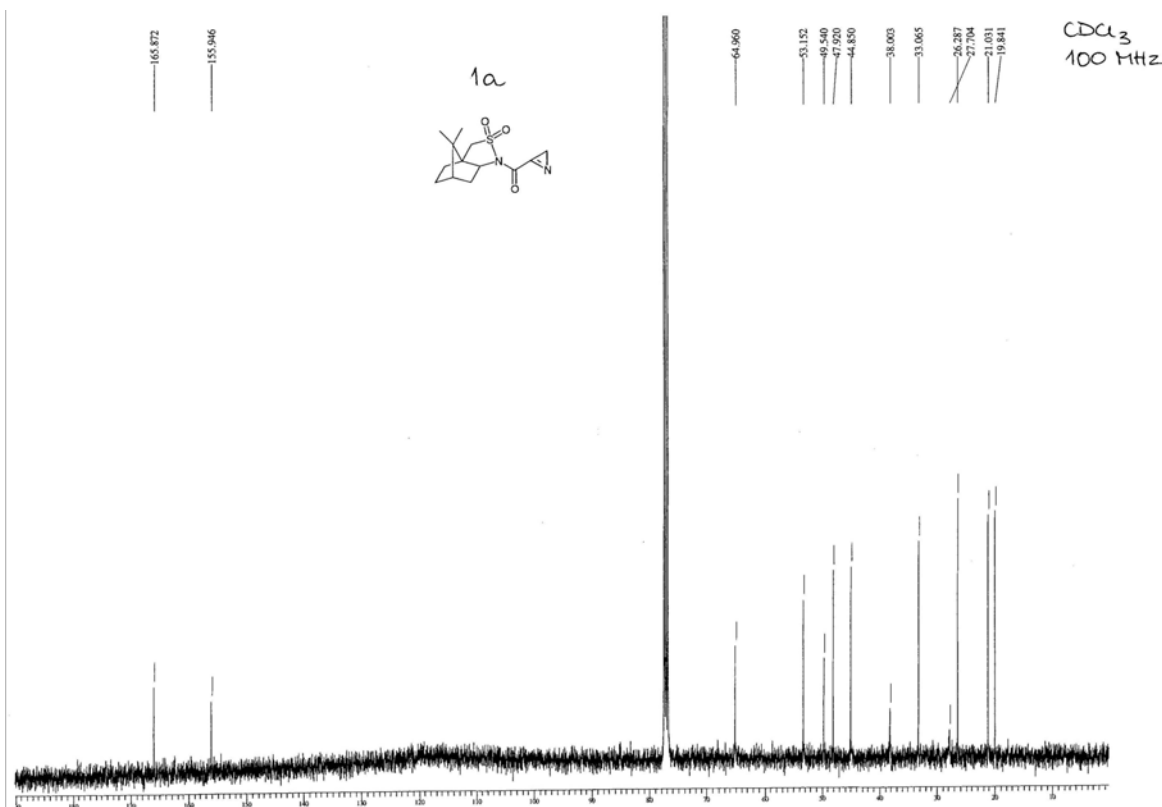

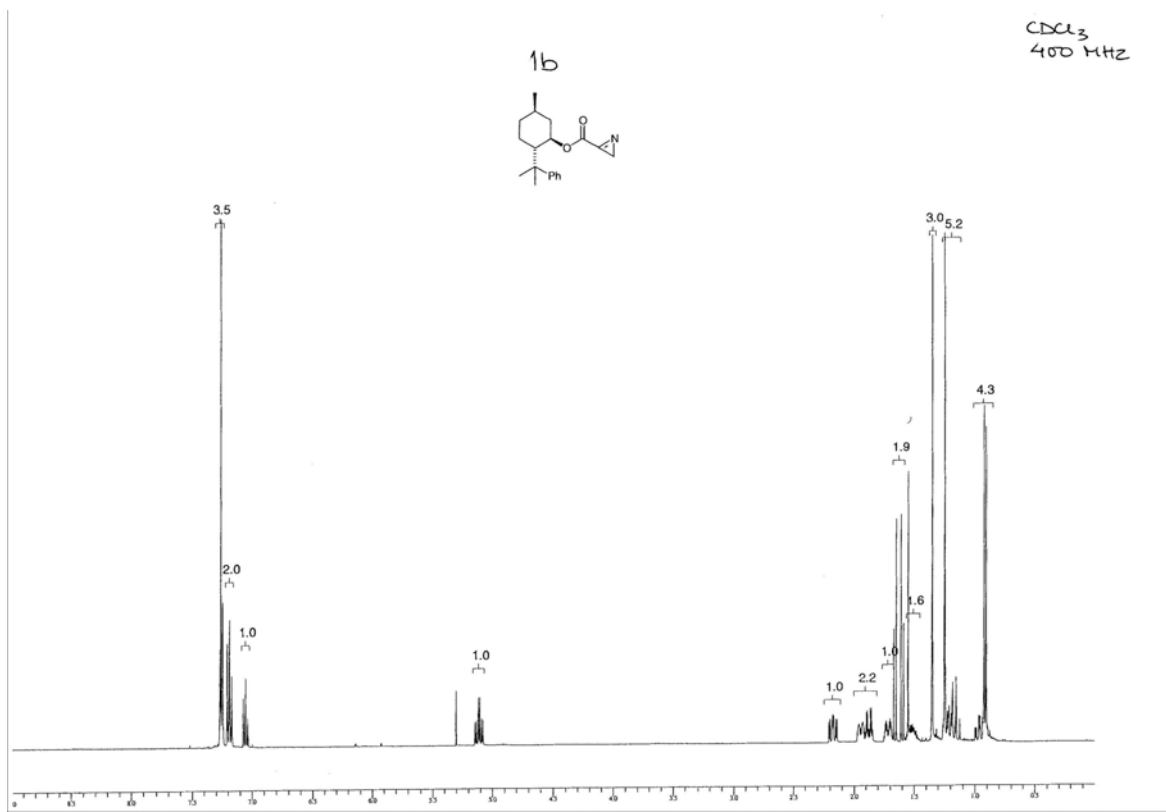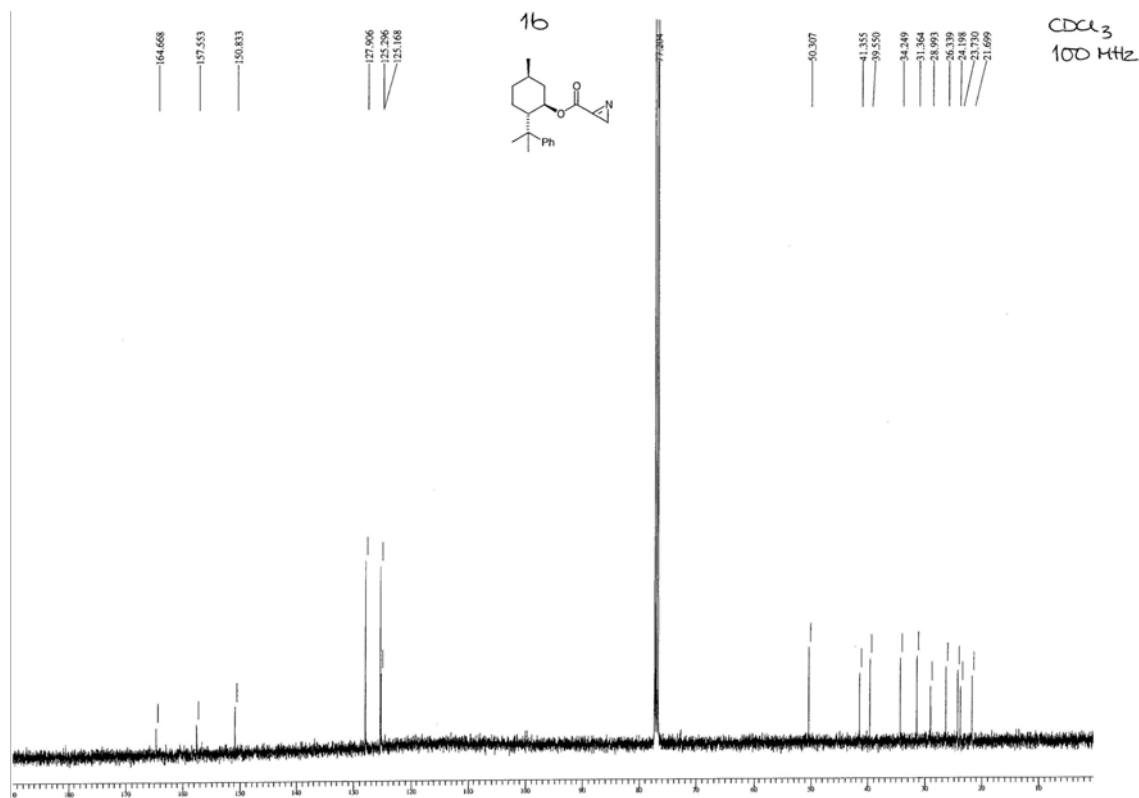

Supplement: Supplementary file 1 [file 5194375]
